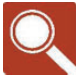

# General Biology and Current Management Approaches of Soft Scale Pests (Hemiptera: Coccidae)

Ernesto Robayo Camacho and Juang-Hong Chong<sup>1</sup>

Department of Agricultural and Environmental Sciences, Pee Dee Research and Education Center, Clemson University, 2200 Pocket Road, Florence, SC 29506 (crobayo@g.clemson.edu; juanghc@clemson.edu).

<sup>1</sup>Corresponding author, e-mail: juanghc@clemson.edu

J. Integ. Pest Mngmt. (2015) 6(1): 17; DOI: 10.1093/jipm/pm016

**ABSTRACT.** We summarize the economic importance, biology, and management of soft scales, focusing on pests of agricultural, horticultural, and silvicultural crops in outdoor production systems and urban landscapes. We also provide summaries on voltinism, crawler emergence timing, and predictive models for crawler emergence to assist in developing soft scale management programs. Phloem-feeding soft scale pests cause direct (e.g., injuries to plant tissues and removal of nutrients) and indirect damage (e.g., reduction in photosynthesis and aesthetic value by honeydew and sooty mold). Variations in life cycle, reproduction, fecundity, and behavior exist among congeners due to host, environmental, climatic, and geographical variations. Sampling of soft scale pests involves sighting the insects or their damage, and assessing their abundance. Crawlers of most univoltine species emerge in the spring and the summer. Degree-day models and plant phenological indicators help determine the initiation of sampling and treatment against crawlers (the life stage most vulnerable to contact insecticides). The efficacy of cultural management tactics, such as fertilization, pruning, and irrigation, in reducing soft scale abundance is poorly documented. A large number of parasitoids and predators attack soft scale populations in the field; therefore, natural enemy conservation by using selective insecticides is important. Systemic insecticides provide greater flexibility in application method and timing, and have longer residual longevity than contact insecticides. Application timing of contact insecticides that coincides with crawler emergence is most effective in reducing soft scale abundance.

**Key Words:** biological control, chemical control, crawler emergence, cultural control, voltinism

Among the scale insects (Hemiptera: Coccoidea), members of Coccidae (the soft scales), Diaspididae (the armored scales), and Pseudococcidae (the mealybugs) are the most common and serious pests in the world (Ben-Dov et al. 2015). Most of the 1,148 soft scale species currently recognized (Ben-Dov et al. 2015) are innocuous herbivores, and a few even produce valuable products. For example, wax from *Ericerus* and *Ceroplastes* spp. is used to make candles, and as polish for furniture, ornaments, traditional medicine, and human food component in India and China (Qin 1997). The most extensively studied soft scale species are agricultural, horticultural, and silvicultural crop pests (Kosztarab 1996, Ben-Dov and Hodgson 1997). Thirty of the 50 economically important soft scale species listed by Gill and Kosztarab (1997) caused damage on ornamental plants and fruit trees in the United States. Globally, 146 soft scale species are either pests (66 species) or potential threats (80 species) to agriculture in the United States (Miller and Miller 2003). Several exotic soft scale species were introduced to North America and Europe through trade of ornamental plants and fruits (Miller and Miller 2003, Stocks 2013, Pellizzari and Porcelli 2014).

There is an enormous amount of literature on the biology, ecology, and management of soft scale pests. Ben-Dov and Hodgson's (1997) "Soft Scale Insects. Their Biology, Natural Enemies and Control" remains the most comprehensive collection of information on soft scales. In this paper, we summarize current knowledge most relevant to soft scale management. We also provide summaries of voltinism, crawler emergence timing, and predictive models for crawler emergence, which will prove useful in developing appropriately timed insecticide application programs.

## Economic Importance

Kosztarab (1997a) estimated that worldwide management costs and losses to soft scale infestations alone reached >US\$1 billion annually. The economic importance of soft scale pests is a function of their

damage, wide host range, propensity to be introduced to new areas, and wide geographical distribution.

## Factors Influencing the Pest Status of Soft Scales

Temperature and humidity are the main abiotic factors limiting the range and abundance of soft scales (Kosztarab 1996). Similar to other insects, developmental rate of soft scales increases with ambient temperature until an optimal temperature is reached, after which the developmental rate declines. The generation times of *Saissetia coffeae* (Walker) were 83, 68, and 49 d at 18, 24, and 30°C, respectively (Abd-Rabou et al. 2009). Li and Su (2002) reported that *S. coffeae* failed to complete development at 30°C. More than 80% of settled *Saissetia oleae* (Olivier) first instars died at temperature >30°C and relative humidity <30% (De Freitas 1972, Pucci et al. 1982). In general, conditions of relatively high temperature and humidity are beneficial to soft scale population growth (Kosztarab 1996). Warmer ambient temperatures due to heat accumulation on paved surfaces in urban areas (i.e. heat islands) increased populations of *Parthenolecanium quercifex* (Fitch) on oak trees in Raleigh, North Carolina (Meineke et al. 2013).

Host plant susceptibility affects infestation level and damage (Vranjic 1997). Susceptibility varies among plant species, varieties, and cultivars (see Host Plant Resistance). Host susceptibility varies in time and space, so outbreaks may occur in one year or one region but not in others (Vranjic 1997). *Ceroplastes sinensis* Del Guercio is a serious pest of citrus in coastal Australia (Beattie and Kaldor 1990, Beattie et al. 1991), but it is only a sporadic pest in Spain, Italy, and Greece (Gill 1988, Stathas et al. 2003a).

Nutrients in the soil and the plant also affect the severity of scale insect infestation (Kunkel 1997). Coffee (*Coffea arabica* L.) plants provided with more nitrogen, potassium, and organic compost amendments supported more *Coccus viridis* (Green) than poorly fertilized plants (Fernandes et al. 2012, Gonthier et al. 2013). Similarly, abundance of *Toumeyella parvicornis* (Cockerell) increased after pines

(*Pinus banksiana* Lamb.) were fertilized with urea (Smirnov and Valero 1975). The increased nitrogen and free amino acid concentrations in fertilized plants provided additional resources for *C. viridis* growth and reproduction, leading to greater abundance (Fernandes et al. 2012, Gonthier et al. 2013). An increase in nitrogen concentration also leads to decreased phytochemical concentrations (Hermes and Mattson 1992). Chlorogenic acid and caffeine stimulated *C. viridis* crawler movement, consequently reducing their feeding and increasing the risks of predation, on poorly fertilized plants (Fernandes et al. 2012). Fenandes et al. (2012) also suggested that coffee plants fertilized with potassium tolerated more *C. viridis* because elevated potassium supplies allowed the plants to increase growth and compensate for resources lost to the soft scales.

In urban environments, soft scale populations thrive on trees under physiological stress (such as water or nutrient deficiency; Kosztarab 1988). Environmental stress and pollution also affect soft scale abundance on urban trees (Kosztarab 1988, Xie et al. 1995). *Eulecanium giganteum* (Shinji) density was positively correlated with air pollutant concentrations (include suspended particles, dust, CO, S, NO<sub>x</sub> and SO<sub>2</sub> produced as a result of automobile traffic) in Taiyuan, China (Xie et al. 1995). Xie et al. (1995) suggested that scale insect density could be used to monitor air pollution on city streets.

### Host Range

Some soft scale species are polyphagous or monophagous, but most are oligophagous (Kosztarab 1996, Miller and Miller 2003). For example, *Eriopeltis* and *Luzulaspis* spp. feed on herbaceous plants; *Parthenolecanium* spp. prefer woody plants; *Physokermes* spp. feed exclusively on conifers; and *Toumeyella* spp. feed mainly on gymnosperms from the families Cupresaceae, Pineaceae, and Taxaceae (Kosztarab 1996).

The majority of introduced species are polyphagous (Miller et al. 2005). Polyphagous species are more likely to become major pests when introduced to new areas because the existing plant species may allow the soft scales to develop and reproduce, thus facilitate the introduced soft scale's establishment (Mitter and Futuyma 1983, Kosztarab 1996). Polyphagous species often develop host-induced biotypes (i.e., variability in their shape, color, and size depending on the host plant; Kosztarab 1996). Biotype and variable morphology have led to misidentification of pest species such as *Parthenolecanium corni* (Bouché) (Ebeling 1938).

### Damage

Soft scales are phloem-sucking insects. After settling at a feeding site, the scale insects pierce the host plant tissue with modified stylets until reaching the phloem vessels, from where they suck plant sap. Phloem sap is rich in carbohydrates but poor in soluble nitrogen compounds, so phloem feeders have to ingest large quantities of sap to meet their nutritional requirements (Malumphy 1997). The excess carbohydrate-rich solution, known as honeydew, is excreted through a complex anal apparatus and mechanism unique to soft scales (Williams and Williams 1980). Honeydew is an ideal substrate for saprophytic sooty mold. A sooty mold colony on the leaf surface reduces photosynthetic rate (through shading photosynthetic cells and interfering with gas exchange through stomata; Kosztarab and Kozár 1988, Mibey 1997, Stauffer and Rose 1997), traps heat from the sunlight (thus potentially scorching the leaf; Gill 1997), and (along with honeydew) reduces the aesthetic and market values of fruits and ornamental plants (Williams and Kosztarab 1972, Katsoyannos 1996, Gill and Kosztarab 1997).

Soft scales damage host directly when their stylets penetrate and injure the vascular and photosynthetic tissues (Gill and Kosztarab 1997, Vranjic 1997). Saliva of some species contains proteinases and cellulases capable of breaking down cells, damaging vascular and photosynthetic tissues in the vicinity of the stylet (Carter 1973). Necrosis produced by individual scale insects is normally localized. Aggregated injury by severe infestations, however, may lead to dieback of twigs and branches (Vranjic 1997).

Feeding by soft scale removes nutrients and carbohydrates from plants, which retards plant growth and recovery (Washburn et al. 1985, Speight 1991). Furthermore, infested host plants are weakened and become more susceptible to attack by other insects and pathogens (Hanson and Miller 1984).

### Life Cycle and Biology

It is difficult to generalize the life cycle and biology of soft scales because variations exist even among congeners (Kosztarab 1996). Thus, we provide here a brief, but not universal, description of soft scale life cycle. Female life cycle consists of egg (Fig. 1), two or three nymphal instars (depending on species), and adult. In biparental species, males have a derived form of incomplete metamorphosis, which consists of two feeding nymphal instars followed by the nonfeeding "prepupal" (third-instar), "pupal" (fourth-instar), and adult (Marotta 1997).

First instars or "crawlers" disperse actively by crawling away from their mothers (Mendel et al. 1984; Fig. 2), or passively by wind or phoresis (Greathead 1997). Washburn and Frankie (1981) demonstrated that *Pulvinariella mesembryanthemi* (Vallot) crawlers disperse more readily by wind than through phoresis. Wind can carry crawlers 55 m to >4 km (Quayle 1916, Rabkin and Le Jeune 1954, Hoelscher 1967, Reed et al. 1970, Washburn and Frankie 1981, Mendel et al. 1984, Washburn and Washburn 1984, Yardeni 1987).

First instars generally remain at the feeding site after settling (Fig. 3). They lack a waxy cover or "test," and consequently are more susceptible to extreme environmental stresses and insecticides (Kosztarab 1996, Marotta 1997). Sexes are indistinguishable among the first instars (Williams 1997).

Second instars are similar in external appearance to, but larger than, the first instars. Sexual dimorphism becomes apparent in older second instars, with the males becoming elongated oval and covered with waxy, translucent platelike tests or "puparia" (Kosztarab 1996). Males develop through the "prepupal" and the "pupal" instars (both instars characterized by developing wing buds) under the protective tests (Miller and Williams 1990). Adult males have two pairs of wings, but the hind wings are either absent or reduced to halteres (or "hamulohalteres"; Giliomee 1997). Adult males emerge from the tests and disperse by flight. The sexual behavior of male soft scales is poorly understood but likely similar to those of armored scales and mealybugs. Adult male armored scales and mealybugs locate females through pheromones (Moreno et al. 1972, Millar et al. 2012, Waterworth and Millar 2012). Being weak fliers, male armored scales only mate with nearby females (Rice and Moreno 1970, Moreno et al. 1972).

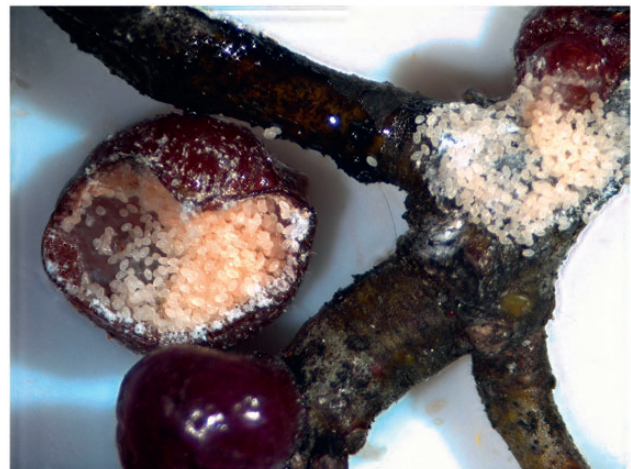

Fig. 1. Eggs within the brood chamber (left) of the oak lecanium scale, *Parthenolecanium quercifex* (Fitch).



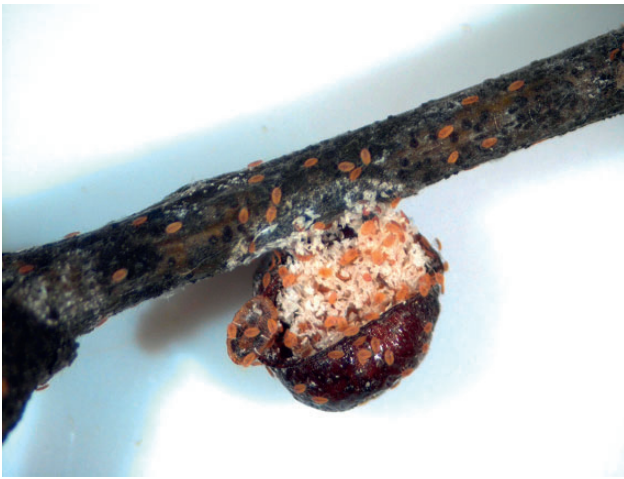

**Fig. 2.** Crawlers of the oak lecanium scale emerging and dispersing from adult female.

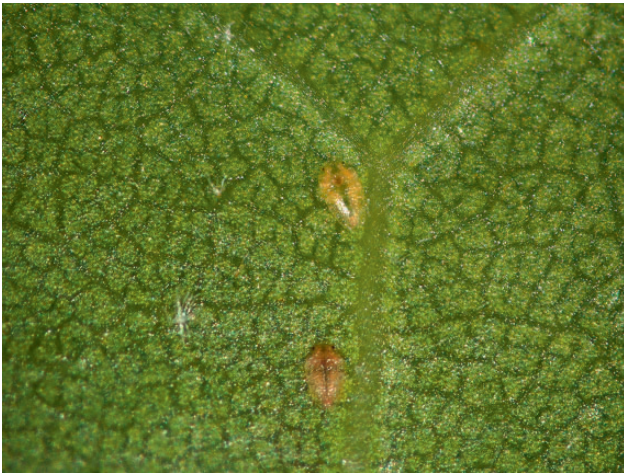

**Fig. 3.** First-instar oak lecanium scales settled on their feeding sites, in proximity to a leaf vein of willow oak.

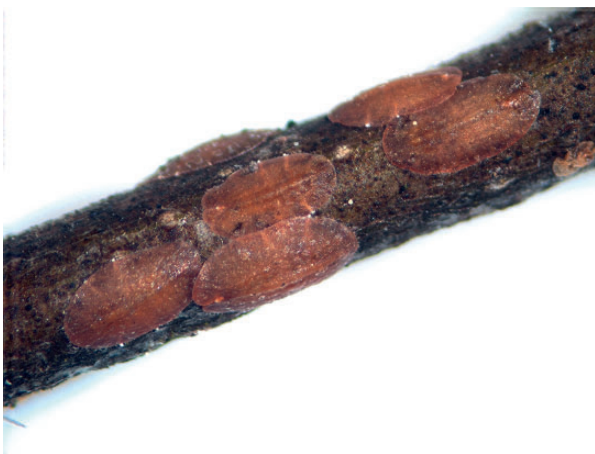

**Fig. 4.** Second instars of the oak lecanium scale, after moving from the leaves to the branches to overwinter.

Female second instars are broadly oval (Fig. 4). Most species develop through third instar, but some species do not [e.g., *E. pela* (Qin 1997)]. A female third instar (Fig. 5) looks similar to an adult, and lasts only 2–4 d. As a result, the third instar is not always identified in life cycle studies (Marotta 1997).

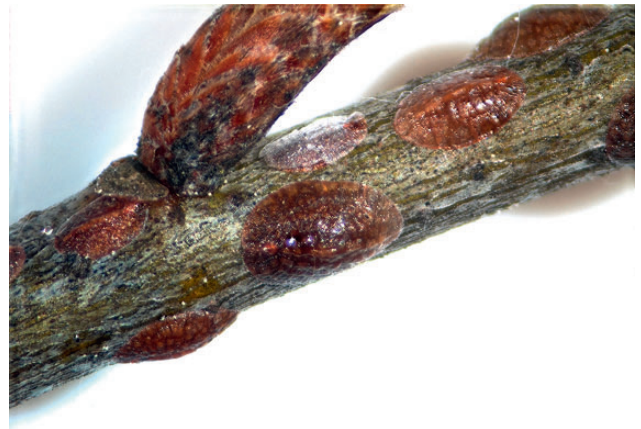

**Fig. 5.** By spring, the second instars of oak lecanium turn to third instars. A second instar that was in the process of shedding the silvery exuvia could be seen in the middle of the twig.

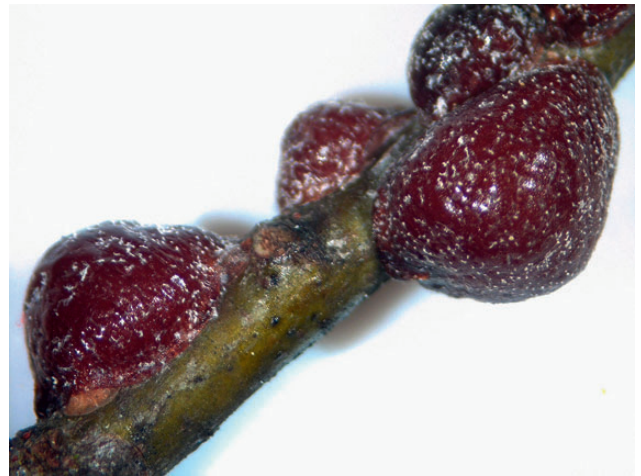

**Fig. 6.** Adult female oak lecanium scales on a willow oak twig. Their bodies swell and turn reddish color as they mature.

Adult females are wingless and neotenic (i.e., resemble the nymphal stage; Fig. 6). An adult female undergoes a series of changes prior to oviposition, such as increase in size, color change, dorsoventral swelling, and formation of either a cavity under the venter (known as the “brood chamber” and occurs in Cero-plastinae, and Coccinae tribe Coccini, Paralecaniini and Saissetiini, Eulecaniinae, and Myzolecaniinae), or a white, waxy ovisac beneath or behind the body (in Filippiinae, Eriopletinae, and the Coccinae tribe Pulvinariini; Marotta 1997).

Most univoltine species overwinter as second instars; others overwinter as adults (Kosztarab 1996). Some species, such as *C. sinensis*, can overwinter as either third instar or adult (Stathas et al. 2003a). In species where nymphs feed on the foliage, second instars migrate to, and overwinter on, twigs and branches. This migration often coincides with or precedes specific changes in host phenology (Michelbacher and Ortega 1958).

Soft scales reproduce either sexually or parthenogenetically (Saakyan-Baranova et al. 1971, Kosztarab 1996). Some species [e.g., *P. corni* and *Pulvinaria vitis* (L.)] can reproduce sexually and parthenogenetically (Schmutterer 1952, Canard 1958, Phillips 1963, Pellizzari 1997); the mechanism that regulates the variable mode of reproduction in these soft scale species is poorly understood.

Fecundity varies greatly among species. Per capita fecundity was less than 24 eggs for *Eucalymnatus tessellatus* (Signoret) (Vesey-Fitzgerald 1940), up to 6,355 eggs for *Ceroplastes destructor* Newstead (Wakgari and Giliomee 2000), and 382–395 crawlers for *Phalacrocooccus howertoni* Hodges and Hodgson (Amarasekare and Mannion 2011). Fecundity also varies among individuals. Per capita fecundity of *Coccus hesperidum* L. ranged from 70 to 1,000 eggs (Tereznikowa 1981) and that of *S. oleae* ranged from 566 to 5,533 offspring (Beingolea 1969). Fecundity was positively correlated to body volume in *P. corni* (Birjandi 1981), and to weight in *Rhodococcus turanicus* (Archangelskaja) (Fan et al. 2013). Host plant, climatic conditions, and altitude may be responsible for variations in sex ratios, parthenogenesis, and fecundity in *C. hesperidum* (Thomsen 1929; Nur 1979, 1980), *E. pela* (Danzig 1980, 1986, 1997), *P. corni* (Thiem 1933a, 1933b; Canard 1958, Saakyan-Baranova et al. 1971), *P. vitis* (Newstead 1903; Schmutterer 1952; Danzig 1959, 1980, 1986; Malumphy 1992), and *S. coffeae* (Thomsen 1929; Nur 1979, 1980).

Among the 70 soft scale species reviewed (almost exclusively agricultural, horticultural, and silvicultural pests), 53% are strictly univoltine, 7% are strictly bivoltine, and 4% are strictly multivoltine (Table 1). Some multivoltine species have as many as five generations annually (e.g., *C. hesperidum* in southern California; Gill 1988). No subfamily, tribe, or genus has a higher tendency to include multivoltine species than the others.

Many soft scale species exhibit great variations in voltinism depending on host, geographical and climatic conditions (Table 1; Marotta and Tranfaglia 1997). A cosmopolitan soft scale species may develop more generations in a warmer country, or a warmer climatic zone within a country. For example, *Ceroplastes rubens* (Maskell) has one generation in Japan and China (Itioka and Inoue 1991, Xia et al. 2005) and two generations in Australia (Loch and Zalucki 1997). *Ceroplastes destructor* is univoltine in central and southern New South Wales but bivoltine in northern New South Wales, Australia (Qin and Gullan 1994). *Saissetia oleae* is univoltine in the inland regions of Greece where hot and dry summers and cold winters prevail (Argyriou 1963), but bivoltine in the coastal regions of Iberian Peninsula and Israel where high summer humidity and mild winters are common (Peleg 1965, De Freitas 1972).

Voltinism also differs among host plant species or cultivars. *Ceroplastes floridensis* is univoltine on *Rhododendron* spp. from Florida to Maryland (Kehr 1972), bivoltine on holly (*Ilex* spp.) in Georgia (Hodges et al. 2001), and multivoltine on citrus and holly in Florida (Johnson and Lyon 1991). *Coccus hesperidum* is univoltine or bivoltine on the “Valencia late” orange variety but multivoltine on the “Hamlin” variety (Panis 1977a). A higher nutritional quality of certain host, or an increased insect enzymatic activity on certain host (Ishaaya and Swirski 1976), may allow soft scales to develop faster and complete additional generations within a year. Host plant phenology, genetic, and induced resistance to infestation also may be responsible for the observed variations (Marotta and Tranfaglia 1997).

Some nominally univoltine species are able to develop multiple generations per year under optimal and (often) controlled conditions in laboratory or greenhouse. For example, although *C. hesperidum* can develop from one to six generations per year outdoors, a seventh generation can develop in greenhouses (Saakyan-Baranova 1964). *Parasaissetia nigra* (Nietner) is usually univoltine with a partial second generation outdoors, but can produce up to six generations in greenhouses (Ben-Dov 1978). Table 1 does not include voltinism information obtained from greenhouse or laboratory studies.

### Integrated Pest Management (IPM)

Soft scales are among the most prevalent and difficult arthropod pests to control in the southern United States (Fulcher et al. 2012). There is a need to optimize soft scale monitoring and management by IPM practitioners (Fulcher et al. 2012).

### Monitoring

Soft scale infestations are detected by looking for populations and damage symptoms. Sampling plans typically determine insect density on a prescribed number of leaves or branches, but procedures vary among crop systems (e.g., citrus in Trumble et al. 1995, Grafton-Cardwell et al. 1999, Martínez-Ferrer et al. 2015; olive in Tena et al. 2007; and tea in Naeimamini et al. 2014). Scouts should be trained and equipped (with handlens, sticky traps, etc.) to detect cryptic signs and symptoms. Honeydew, sooty mold, and honeydew-seeking ants are general signs of phloem-feeding insect infestations; they can be used to pinpoint the areas where plants may be inspected for the presence of soft scales. Monitoring or mating disruption of soft scales with pheromone baits is not available.

Degree-day models and plant phenological indicators predict crawler emergence and inform scouts and IPM practitioners on when to initiate sampling and treatment (Mussey and Potter 1997, Herms 2004). Only a small number of IPM practitioners implement these predictive models because of the high diversity of pests (and plants) that require management (each may require a unique model, but see Kulhanek 2009), the time needed to learn, calculate and implement the models (LeBude et al. 2012), and the difficulty in interpreting the observed plant phenophase. Few predictive models for soft scales have been published (Table 2), further impeding their adoption.

Crawler presence can be confirmed by looking for the crawlers on the leaves and branches, or by deploying a modified sticky trap. The sticky trap is made of a double-sided tape (or a single-side tape with the adhesive surface facing outward) wrapped around a twig or branch where gravid soft scales are present. The trap is inspected regularly for captured crawlers.

Despite its importance in determining insecticide application timing, crawler emergence period is reported for only 49 soft scale species (Table 3). In the United States, *P. corni* crawlers emerge earlier in the southern states (Hodges and Braman 2004, Klingeman et al. 2002) than those in the northern states (Asquith 1949, Krischik and Davidson 2003, Herms 2004, Hoover et al. 2011). Crawlers of most univoltine species emerge in the spring through the summer, i.e. April through June in the United States and October through February in the Southern Hemisphere (Table 3).

### Economic Threshold

On ornamental plants grown in nurseries or landscapes, pest management tactics are often applied whenever scale insect populations or damage becomes noticeable (Bethke 2010). Economic thresholds vary among perennial fruits and nut crops. The economic thresholds of *C. floridensis* in citrus orchards of Egypt are 24.4, 26.6–28.4, and 25.1–27.0 individuals per twig in June, October, and December, respectively (Salem and Zaki 1985, Helmy et al. 1986).

### Cultural Control

The goal of cultural control is to make the environment less favorable to pest development and reproduction. Proper fertilization, pruning, and irrigation maintain plant vigor, promote plant tolerance to pest damage, and reduce sap-sucking insect population growth (CAST 2003, Dreistadt 2008, Kabashima and Dreistadt 2014). However, few studies have demonstrated the efficacy and underlying mechanism of these cultural management practices. Pruning is effective in removing infested plant tissues and reducing populations of *S. oleae* and *Coccus pseudomagnoliarum* (Kuwana) (Kabashima and Dreistadt 2014). Pruned olive trees harbored 200% fewer nymphs and 50% fewer adult *S. oleae* compared to unpruned trees (Ouguas and Chemseddine 2011). Excessive irrigation increased the developmental rate of *C. destructor* (Milne 1993).

### Host Plant Resistance

It is generally recommended that pest-resistant plant species or cultivars should replace those that are susceptible to pests and damage (Kabashima and Dreistadt 2014). However, few studies investigated resistance or tolerance of various host plant species or cultivars to soft scales in the field. Potter and Redmond (2013) reported that American



Table 1. Voltinism of soft scale pests on host species and locations identified in the cited references

| Subfamily                                          | Tribe                                           | Genus        | Species                                                             | Host cited in the references                                                         | Location(s)                        | Generations per year <sup>a</sup> | Reference(s)                                                                                |
|----------------------------------------------------|-------------------------------------------------|--------------|---------------------------------------------------------------------|--------------------------------------------------------------------------------------|------------------------------------|-----------------------------------|---------------------------------------------------------------------------------------------|
| Cardiococcinae<br>Ceroplastinae                    | Cardiococcini<br>Ceroplastini                   | Ceroplastes  | <i>albolineatus ceriferus</i>                                       | <i>Pittocaulon praecox</i>                                                           | Mexico                             | N/A                               | (Narada and Lechuga 1971)                                                                   |
|                                                    |                                                 |              |                                                                     | Various                                                                              | Italy; Maryland, Virginia, USA     | 2                                 | (Kosztarab 1996, Mori et al. 2001)                                                          |
|                                                    |                                                 |              |                                                                     | <i>Citrus</i> spp.                                                                   | Japan                              | 1                                 | (Ohgushi 1969)                                                                              |
|                                                    |                                                 |              |                                                                     | Burford holly ( <i>Ilex cornuta</i> 'Burfordi')                                      | Georgia, USA                       | 1                                 | (Hodges and Bramean 2004)                                                                   |
|                                                    |                                                 |              |                                                                     | Fruit trees                                                                          | Chile                              | 1-2                               | (Bayer CropScience Chile 2014)                                                              |
|                                                    |                                                 |              |                                                                     | <i>Citrus</i> spp.                                                                   | Georgia                            | 1                                 | (Tulashvili 1930)                                                                           |
|                                                    |                                                 |              |                                                                     | Various                                                                              | California, USA                    | 1                                 | (Ben-Dov 1993, Kosztarab 1997b)                                                             |
|                                                    |                                                 |              |                                                                     | Various                                                                              | Texas, USA                         | 1                                 | (Johnson and Lyon 1991)                                                                     |
|                                                    |                                                 |              |                                                                     | Guava                                                                                | Egypt                              | 2                                 | (Bakr et al. 2010)                                                                          |
|                                                    |                                                 |              |                                                                     | Passion fruit ( <i>Passiflora edulis</i> )                                           | Central coast, Peru                | 3                                 | (Marin-Loayza and Cisneros-Vera 1996)                                                       |
|                                                    |                                                 |              |                                                                     | <i>Citrus</i> spp.                                                                   | New Zealand                        | 1                                 | (Olson et al. 1993, Lo et al. 1996)                                                         |
|                                                    |                                                 |              |                                                                     | <i>Citrus</i> spp., guava ( <i>Psidium guajava</i> ),<br><i>Syzygium malaccensis</i> | South Africa                       | 1                                 | (Wakgari and Gilomee 2000)                                                                  |
|                                                    |                                                 |              |                                                                     | Ceroplastinae                                                                        | Ceroplastini                       | Ceroplastes                       | <i>floridensis</i>                                                                          |
| <i>Citrus</i> spp.                                 | Wales, Australia                                | 2            | (Smith 1970, Qin and Gullan 1994)                                   |                                                                                      |                                    |                                   |                                                                                             |
| Apple, persimmon                                   | Queensland, Northern New South Wales, Australia | 2            |                                                                     |                                                                                      |                                    |                                   |                                                                                             |
| <i>Rhododendron</i> spp.                           | Yunnan, China                                   | 1            | (Yun 1994)                                                          |                                                                                      |                                    |                                   |                                                                                             |
| Holly ( <i>Ilex</i> spp.)                          | Florida to Maryland, USA                        | 1            | (Kehr 1972)                                                         |                                                                                      |                                    |                                   |                                                                                             |
| <i>Citrus</i> spp.                                 | Georgia, USA                                    | 2            | (Hodges et al. 2001)                                                |                                                                                      |                                    |                                   |                                                                                             |
| <i>Citrus</i> spp., grapefruit, mango              | Greece                                          | 2            | (Argyriou and Kourmadas 1980)                                       |                                                                                      |                                    |                                   |                                                                                             |
| <i>Citrus</i> spp., <i>Cinnamomum japonicum</i>    | Israel                                          | 2            | (Yardeni and Rosen 1995, Pellizzari 1997)                           |                                                                                      |                                    |                                   |                                                                                             |
| <i>Citrus</i> spp.                                 | Fujian, China                                   | 2(3 partial) | (Kaiju 2011)                                                        |                                                                                      |                                    |                                   |                                                                                             |
| <i>Citrus</i> spp., guava, banana                  | Queensland, Australia                           | 2            | (Smith et al. 1997)                                                 |                                                                                      |                                    |                                   |                                                                                             |
| Various                                            | Egypt                                           | 2-3          | (Salem and Hamdy 1985, Helmy et al. 1986, Abd-Elhalim Moharum 2011) |                                                                                      |                                    |                                   |                                                                                             |
| Various                                            | Florida, USA                                    | 3            | (Johnson and Lyon 1991)                                             |                                                                                      |                                    |                                   |                                                                                             |
| Orange, Passion fruit ( <i>Passiflora edulis</i> ) | Peru                                            | 3            | (Marin-Loayza and Cisneros-Vera 1996)                               |                                                                                      |                                    |                                   |                                                                                             |
| Ceroplastinae                                      | Ceroplastini                                    | Ceroplastes  | <i>japonicus</i>                                                    | Poplar, bay laurel, maple, persimmon                                                 | China; Italy                       | 1                                 | (Pellizzari and Camporese 1994, Davis et al. 2005, Yongxiang 2008)                          |
|                                                    |                                                 |              |                                                                     | Various                                                                              | Croatia                            | 1                                 | (Masten-Milek et al. 2007)                                                                  |
|                                                    |                                                 |              |                                                                     | <i>Citrus</i> spp.                                                                   | Japan                              | 1                                 | (Ohgushi 1969)                                                                              |
|                                                    |                                                 |              |                                                                     | Persimmon                                                                            | China; Korea                       | 1                                 | (Park et al. 1990, Wang et al. 2006)                                                        |
|                                                    |                                                 |              |                                                                     | Lychee, mango                                                                        | Southern Taiwan, Republic of China | 3                                 | (Wen and Lee 1986)                                                                          |
|                                                    |                                                 |              |                                                                     | Various                                                                              | Shanghai and Kunming, China        | 1                                 | (Tao et al. 2003, Xia et al. 2005)                                                          |
|                                                    |                                                 |              |                                                                     | <i>Citrus</i> spp.                                                                   | Japan                              | 1                                 | (Yasumatsu 1958)                                                                            |
|                                                    |                                                 |              |                                                                     | <i>Citrus</i> spp., <i>Schefflera actinophylla</i>                                   | Australia                          | 2                                 | (Loch and Zalucki 1997)                                                                     |
|                                                    |                                                 |              |                                                                     | Fig tree                                                                             | Mediterranean coast, France        | 1                                 | (Benassy and Franco 1974)                                                                   |
|                                                    |                                                 |              |                                                                     | Fig tree ( <i>Ficus carica</i> )                                                     | Algeria; Greece; Turkey            | 2                                 | (Argyriou and Santorini 1980, Ozsemerci and Aksit 2003, Biche et al. 2012)                  |
|                                                    |                                                 |              |                                                                     | Quince                                                                               | Egypt                              | 2                                 | (Ragab 1995)                                                                                |
|                                                    |                                                 |              |                                                                     | <i>Citrus</i> spp., fig tree                                                         | Italy; Spain                       | 2                                 | (Inserra 1970, Longo and Russo 1986, De la Cruz Blanco et al. 2010, Pellizzari et al. 2010) |
|                                                    |                                                 |              |                                                                     | Ceroplastinae                                                                        | Ceroplastini                       | Ceroplastes                       | <i>sinensis</i>                                                                             |
| <i>Ilex</i> spp.                                   | Virginia, USA                                   | 1            | (Williams and Kosztarab 1972, Kosztarab 1996)                       |                                                                                      |                                    |                                   |                                                                                             |
| <i>Citrus</i> spp., pear                           | Greece; Italy                                   | 1            | (Frediani 1960, Stathas et al. 2003a)                               |                                                                                      |                                    |                                   |                                                                                             |
| <i>Citrus</i> spp.                                 | Coastal districts, Australia                    | 1            | (Snowball 1970)                                                     |                                                                                      |                                    |                                   |                                                                                             |
| <i>Citrus</i> spp.                                 | New Zealand                                     | 1            | (Cottier and Wellington 1939)                                       |                                                                                      |                                    |                                   |                                                                                             |

(continued)



Table 1. Continued

| Subfamily        | Tribe                                                                                                                                                       | Genus                                                            | Species                | Host cited in the references                                                                                       | Location(s)                                                         | Generations per year <sup>a</sup> | Reference(s)                                                         |
|------------------|-------------------------------------------------------------------------------------------------------------------------------------------------------------|------------------------------------------------------------------|------------------------|--------------------------------------------------------------------------------------------------------------------|---------------------------------------------------------------------|-----------------------------------|----------------------------------------------------------------------|
| Coccinae         | Saissetiini                                                                                                                                                 | <i>Pulvinariella</i>                                             | <i>hydrangeae</i>      | Conifers<br>Hydrangea, cherry, others                                                                              | Turkey<br>Australia; Europe; Japan; California,<br>East Coast, USA  | 2                                 | (Ülgençtürk et al. 2004)<br>(Williams and Kosztarab 1972, Gill 1988) |
|                  |                                                                                                                                                             |                                                                  | <i>polygonata</i>      | Mango<br>Various                                                                                                   | India<br>China                                                      | 1<br>2-3                          | (Chatterji and Datta 1974)<br>(Peng et al. 1990)                     |
|                  |                                                                                                                                                             |                                                                  | <i>psidii</i>          | Citrus                                                                                                             | Taiwan                                                              | 3                                 | (Takahashi 1939)                                                     |
|                  |                                                                                                                                                             |                                                                  | <i>rhois</i>           | Guava<br>poison oak ( <i>Rhus diversiloba</i> ),<br>peach, plum, apple and currant<br>( <i>Ribes</i> ), prune      | Egypt<br>California, USA                                            | 2, 3<br>1                         | (Baker et al. 2012)<br>(Essig 1958)                                  |
|                  |                                                                                                                                                             |                                                                  | <i>vitis</i>           | Peach<br>Poplar, alder, beech, willow,<br>hawthorne                                                                | Canada<br>New Zealand                                               | 1<br>1                            | (Phillips 1963)<br>(Charles et al. 2005)                             |
|                  |                                                                                                                                                             |                                                                  | <i>mesembryanthemi</i> | Various<br>Iceplant (Aizoaceae)                                                                                    | Eastern USA<br>Northern California, USA<br>Southern California, USA | 1<br>2<br>3-4                     | (Essig 1915)<br>(Tassan and Hagen 1995)<br>(Tassan and Hagen 1995)   |
|                  |                                                                                                                                                             |                                                                  | <i>nigra</i>           | <i>Ficus, Hedera</i>                                                                                               | California, Florida, USA                                            | 1 (2 partial)                     | (Smith 1944)                                                         |
|                  |                                                                                                                                                             |                                                                  | <i>corni apuliae</i>   | Grapevine ( <i>Vitis vinifera</i> )                                                                                | Italy                                                               | 2                                 | (Nuzzaci 1969a)                                                      |
|                  |                                                                                                                                                             |                                                                  | <i>corni corni</i>     | <i>Coryllus</i><br>Hazelnut                                                                                        | Greece<br>Turkey                                                    | 1<br>1                            | (Santas 1985)<br>(Ecevit et al. 1987)                                |
|                  |                                                                                                                                                             |                                                                  |                        | Various<br>Plum                                                                                                    | France<br>New Zealand                                               | 1<br>1                            | (Canard 1958)<br>(Charles et al. 2005)                               |
|                  |                                                                                                                                                             |                                                                  |                        | Various                                                                                                            | Krasnodar, Russia<br>Virginia, USA                                  | 1<br>1                            | (Borchsenius 1957)<br>(Day 2008)                                     |
|                  |                                                                                                                                                             |                                                                  |                        | Deciduous fruits, nuts ( <i>Prunus</i> spp.)<br>and ornamental trees and shrubs<br>( <i>Toyon, Ceanothus</i> spp.) | California, USA                                                     | 1                                 | (Kawecki 1958, Madsen and Barnes 1959)                               |
|                  |                                                                                                                                                             |                                                                  |                        | Grape<br>Black poplar ( <i>Populus nigra</i> )                                                                     | Chile<br>Hungary                                                    | 2<br>2                            | (Bayer CropScience Chile 2014)<br>(Kosztarab 1959)                   |
|                  |                                                                                                                                                             |                                                                  |                        | Peach                                                                                                              | Pennsylvania, USA                                                   | 2                                 | (Asquith 1949)                                                       |
|                  |                                                                                                                                                             |                                                                  |                        | Black locust ( <i>Robinia pseudoacacia</i> )                                                                       | Krasnodar, Russia                                                   | 2                                 | (Borchsenius 1957)                                                   |
|                  |                                                                                                                                                             |                                                                  |                        | Conifers ( <i>Biota, Cupressus,</i><br><i>Juniperus, Tsuga, Thuja</i> )                                            | Krasnodar, Russia<br>Hungary                                        | 3<br>1                            | (Borchsenius 1957)<br>(Kosztarab 1997b)                              |
|                  |                                                                                                                                                             |                                                                  | <i>fletcheri</i>       | Conifers, arborvitae, yew, pachysan-<br>dra, Eastern red cedar                                                     | Virginia, USA                                                       | 1                                 | (Kosztarab 1997b)                                                    |
|                  |                                                                                                                                                             |                                                                  | <i>orientale</i>       | Arborvitae, yew, juniper, cypress,<br>hemlock                                                                      | Pennsylvania, Illinois, USA                                         | 1                                 | (Stimmel 1978, Hoover 2006)                                          |
|                  |                                                                                                                                                             |                                                                  | <i>perlatum</i>        | Peach<br>Locust and grape                                                                                          | Henan, Shandong, China<br>Henan, Shandong, China                    | 1<br>2                            | (AQSIQ 2007)<br>(AQSIQ 2007)                                         |
|                  |                                                                                                                                                             |                                                                  | <i>persicae</i>        | <i>Citrus</i> spp.<br>Various fruit trees                                                                          | Argentina<br>Chile                                                  | 1<br>1                            | (Teran and Guyot 1969)<br>(Bayer CropScience Chile 2014)             |
|                  |                                                                                                                                                             |                                                                  |                        | Various<br>Various ornamental plants                                                                               | Israel<br>USA                                                       | 1<br>1                            | (Ben-Dov 1993)<br>(Kosztarab 1996)                                   |
|                  |                                                                                                                                                             |                                                                  |                        | Grapevine ( <i>Vitis vinifera</i> )                                                                                | Australia; Southern Greece<br>New Zealand                           | 1<br>1-2                          | (Stathas et al. 2003b, Buchanan 2008)<br>(Charles et al. 2005)       |
|                  |                                                                                                                                                             |                                                                  | <i>pomeranicum</i>     | Various                                                                                                            | Former Soviet Union                                                 | 2                                 | (Borchsenius 1957)                                                   |
| <i>prunosum</i>  | Various<br>Yew                                                                                                                                              | Central Asia<br>Europe                                           | 2<br>1                 | (Ben-Dov 1993)<br>(Del-Bene 1991)                                                                                  |                                                                     |                                   |                                                                      |
| <i>quercifex</i> | Walnut<br>Grapevine ( <i>Vitis vinifera</i> )<br>Oaks ( <i>Quercus</i> spp.), hickory, birch,<br>persimmon, American sycamore<br>Coast live oak, valley oak | California, USA<br>Australia<br>Virginia, USA<br>California, USA | 1<br>1<br>1<br>1       | (Michelbacher and Swift 1954)<br>(Buchanan 2008)<br>(Williams and Kosztarab 1972)<br>(Swiecki and Bernhardt 2006)  |                                                                     |                                   |                                                                      |

(continued)

Table 1. Continued

| Subfamily | Tribe | Genus | Species        | Host cited in the references                                                                                   | Location(s)                                                                                                                                                                                                                                                                 | Generations per year <sup>a</sup>               | Reference(s)                                                                                                                                                                                                                                                                                                                                                                                                                              |
|-----------|-------|-------|----------------|----------------------------------------------------------------------------------------------------------------|-----------------------------------------------------------------------------------------------------------------------------------------------------------------------------------------------------------------------------------------------------------------------------|-------------------------------------------------|-------------------------------------------------------------------------------------------------------------------------------------------------------------------------------------------------------------------------------------------------------------------------------------------------------------------------------------------------------------------------------------------------------------------------------------------|
|           |       |       | <i>rufulum</i> | <i>Quercus frainetto</i> , <i>Q. cerris</i> , <i>Q. ithaburensis</i> ssp. <i>macrolepis</i>                    | Greece                                                                                                                                                                                                                                                                      | 1                                               | (Gounari et al. 2012)                                                                                                                                                                                                                                                                                                                                                                                                                     |
|           |       |       | <i>coffeae</i> | <i>Quercus robur</i><br>Various fruit trees<br>Olive tree<br>N/A<br>Various<br>Various<br>Olive tree<br>Citrus | Northeastern Italy<br>Chile<br>Chile<br>California, USA<br>New Zealand<br>Florida, USA<br>Israel<br>Corsica, French Riviera, France;<br>Greece; Israel; Calabria, Sicily,<br>Italy; Portugal; Almazora, Spain;<br>Tunisia; Aegean Sea coast, Turkey<br>Greece; Italy; Spain | 1<br>1<br>1<br>2<br>1-2<br>2+<br>2+<br>3,4<br>1 | (Rainatto and Pellizzari 2009)<br>(Bayer CropScience Chile 2014)<br>(González and Lambrot 1989)<br>(Hamon and Williams 1984)<br>(Charles et al. 2005)<br>(Gill 1988)<br>(Rosen et al. 1971)<br>(Argyriou 1963, Peleg 1965, Panis 1977b,<br>De Freitas 1972, Jarraya 1974,<br>Tuncyurek and Oncuer 1974, Blumberg<br>et al. 1975, Longo and Russo 1986)<br>(Bibolini 1958, Argyriou 1963, Briaies and<br>Campos 1986; Noguera et al. 2003) |
|           |       |       | <i>oleae</i>   | Olive tree                                                                                                     | Chile                                                                                                                                                                                                                                                                       | 1                                               | (Bayer CropScience Chile 2014)                                                                                                                                                                                                                                                                                                                                                                                                            |
|           |       |       |                | Various fruit trees                                                                                            | Inland California, USA                                                                                                                                                                                                                                                      | 1                                               | (Dreistadt 2004)                                                                                                                                                                                                                                                                                                                                                                                                                          |
|           |       |       |                | Various                                                                                                        | Coastal California, USA                                                                                                                                                                                                                                                     | 2                                               | (Dreistadt 2004)                                                                                                                                                                                                                                                                                                                                                                                                                          |
|           |       |       |                | Olive tree                                                                                                     | Coastal Greece; Israel; Italy;                                                                                                                                                                                                                                              | 2                                               | (Argyriou 1963, Nuzzaci 1969b, Rosen<br>et al. 1971, Viggiani et al. 1973)                                                                                                                                                                                                                                                                                                                                                                |
|           |       |       |                | Citrus                                                                                                         | Coastal Greece; Israel; Spain                                                                                                                                                                                                                                               | 2                                               | (Argyriou 1963, Blumberg et al. 1975,<br>Llorens-Climent 1984)                                                                                                                                                                                                                                                                                                                                                                            |
|           |       |       |                | Citrus                                                                                                         | Florida, USA; coast of Morocco;<br>Portugal                                                                                                                                                                                                                                 | 3                                               | (Panis 1977b)                                                                                                                                                                                                                                                                                                                                                                                                                             |
|           |       |       |                | Citrus                                                                                                         | Subtropical areas, Australia                                                                                                                                                                                                                                                | 4                                               | (Waterhouse and Sands 2001)                                                                                                                                                                                                                                                                                                                                                                                                               |
|           |       |       |                | <i>Citrus</i> sp.                                                                                              | Peru                                                                                                                                                                                                                                                                        | 5-6                                             | (Beingolea 1969)                                                                                                                                                                                                                                                                                                                                                                                                                          |
|           |       |       |                | Stone fruits                                                                                                   | N/A                                                                                                                                                                                                                                                                         |                                                 |                                                                                                                                                                                                                                                                                                                                                                                                                                           |
|           |       |       |                | Various                                                                                                        | Central Asia                                                                                                                                                                                                                                                                | 1                                               | (Babayan 1973)                                                                                                                                                                                                                                                                                                                                                                                                                            |
|           |       |       |                | Beech, willow, birch, hickory, peach                                                                           | China                                                                                                                                                                                                                                                                       | 1                                               | (Zhao et al. 1998)                                                                                                                                                                                                                                                                                                                                                                                                                        |
|           |       |       |                | Stone fruit, walnut, pear                                                                                      | Japan                                                                                                                                                                                                                                                                       | 1                                               | (Kuwana 1923)                                                                                                                                                                                                                                                                                                                                                                                                                             |
|           |       |       |                | <i>Acer campestre</i> , <i>A. pseudoplatanus</i> ,<br><i>Crataegus monogyna</i> , <i>C. oxyacantha</i>         | Russia                                                                                                                                                                                                                                                                      | 1                                               | (Danzig 1980)                                                                                                                                                                                                                                                                                                                                                                                                                             |
|           |       |       |                | Ornamental plants and brodleaved trees                                                                         | Tropical zones                                                                                                                                                                                                                                                              | 2                                               | (Qin 1997)                                                                                                                                                                                                                                                                                                                                                                                                                                |
|           |       |       |                | Various                                                                                                        | Quebec, Canada; Virginia, Michigan,<br>USA                                                                                                                                                                                                                                  | 1                                               | (Wallner 1969, Williams and Kosztarab<br>1972, Kosztarab 1996)                                                                                                                                                                                                                                                                                                                                                                            |
|           |       |       |                | Stone fruit, walnut, pear                                                                                      | California, Maryland, USA                                                                                                                                                                                                                                                   | 1                                               | (Madsen and Barnes 1959, Kosztarab<br>1996)                                                                                                                                                                                                                                                                                                                                                                                               |
|           |       |       |                | <i>Acer campestre</i> , <i>A. pseudoplatanus</i> ,<br><i>Crataegus monogyna</i> , <i>C. oxyacantha</i>         | Turkey                                                                                                                                                                                                                                                                      | 1                                               | (Ügentürk and Çanakçıoğlu 2004)                                                                                                                                                                                                                                                                                                                                                                                                           |
|           |       |       |                | Ornamental plants and brodleaved trees                                                                         | England; California, USA                                                                                                                                                                                                                                                    | 1                                               | (Gill 1988, Alford 2007)                                                                                                                                                                                                                                                                                                                                                                                                                  |
|           |       |       |                | Various                                                                                                        | California, USA                                                                                                                                                                                                                                                             | 1                                               | (McKenzie 1951, Husseiny and Madsen<br>1962)                                                                                                                                                                                                                                                                                                                                                                                              |
|           |       |       |                | <i>Quercus frainetto</i> , <i>Q. cerris</i> , <i>Q. ithaburensis</i> ssp. <i>Macrolepis</i>                    | Greece                                                                                                                                                                                                                                                                      | 1                                               | (Gounari et al. 2012)                                                                                                                                                                                                                                                                                                                                                                                                                     |
|           |       |       |                | Various                                                                                                        | Bulgaria, Georgia, Russia; California,<br>USA                                                                                                                                                                                                                               | 1                                               | (Hadzibejli 1967, Tzalev 1968, Kosztarab<br>and Kozár 1988)                                                                                                                                                                                                                                                                                                                                                                               |
|           |       |       |                | <i>Abies</i> , <i>Picea</i>                                                                                    | Georgia                                                                                                                                                                                                                                                                     | 1                                               | (Hadzibejli 1967)                                                                                                                                                                                                                                                                                                                                                                                                                         |
|           |       |       |                | Conifers ( <i>Abies</i> , <i>Picea</i> )                                                                       | Germany                                                                                                                                                                                                                                                                     | 1                                               | (Kosztarab 1997b)                                                                                                                                                                                                                                                                                                                                                                                                                         |
|           |       |       |                | Greek fir ( <i>Abies cephalonica</i> )                                                                         | Greece                                                                                                                                                                                                                                                                      | 1                                               | (Stathas 2001)                                                                                                                                                                                                                                                                                                                                                                                                                            |
|           |       |       |                | <i>Corylus</i> , <i>Juglans regia</i> , Rosaceae                                                               | Europe                                                                                                                                                                                                                                                                      | 1                                               | (Schmutterer 1952)                                                                                                                                                                                                                                                                                                                                                                                                                        |
|           |       |       |                | Apple                                                                                                          | Turkey                                                                                                                                                                                                                                                                      | 1                                               | (Ozgoğçe et al. 2001)                                                                                                                                                                                                                                                                                                                                                                                                                     |
|           |       |       |                | Spruce                                                                                                         | Germany                                                                                                                                                                                                                                                                     | 1                                               | (Schmutterer 1956)                                                                                                                                                                                                                                                                                                                                                                                                                        |
|           |       |       |                | <i>Abies cephalonica</i> , <i>A. borisii regis</i>                                                             | Greece                                                                                                                                                                                                                                                                      | 1                                               | (Gounari et al. 2012)                                                                                                                                                                                                                                                                                                                                                                                                                     |

(continued)



Table 1. Continued

| Subfamily | Tribe | Genus                      | Species                       | Host cited in the references                                                                                                                                                       | Location(s)                                                                                                                | Generations per year <sup>a</sup> | Reference(s)                                                                                                                                                                                                                       |
|-----------|-------|----------------------------|-------------------------------|------------------------------------------------------------------------------------------------------------------------------------------------------------------------------------|----------------------------------------------------------------------------------------------------------------------------|-----------------------------------|------------------------------------------------------------------------------------------------------------------------------------------------------------------------------------------------------------------------------------|
|           |       |                            | <i>inopiatius insignicola</i> | <i>Picea</i><br>Greek fir ( <i>Abies cephalonica</i> )<br>Monterey and Bishop pines ( <i>Pinus rdiata</i> and <i>P. muricata</i> )                                                 | Central Europe<br>Pennsylvania, USA<br>Greece<br>California, USA                                                           | 1<br>1<br>1<br>1                  | (Kosztarab and Kozár 1988)<br>(Stimmel 1996)<br>(Stathas and Kozár 2010)<br>(Gill 1988)                                                                                                                                            |
|           |       |                            | <i>piceae</i>                 |                                                                                                                                                                                    | Colorado, USA                                                                                                              | 1                                 | (Cranshaw et al. 1994)                                                                                                                                                                                                             |
|           |       | <i>Rhodococcus</i>         | <i>shanxiensis turanicus</i>  | N.A.<br>Stone fruits                                                                                                                                                               | Serbia<br>China                                                                                                            | 1<br>1                            | (Graora et al. 2012)<br>(Wu and Yu 2000)                                                                                                                                                                                           |
|           |       | <i>Sphaerolecanium</i>     | <i>prunastri prunastri</i>    | Apricot<br>Purpleleaf plum, <i>Pyracantha</i> spp.<br>Stone fruits                                                                                                                 | Armenia<br>Xinjiang, China<br>Pennsylvania, USA<br>Greece; Israel; high altitude regions, Italy                            | 1<br>1<br>1<br>1                  | (Babayán 1986)<br>(Fan et al. 2013)<br>(Hoover et al. 2011)<br>(Silvestri 1939, Ben-Dov 1968, Argyriou and Paloukis 1976)                                                                                                          |
|           |       | <i>Eulecaniinae</i>        |                               | Stone fruits                                                                                                                                                                       | Southern plains, Italy                                                                                                     | 2                                 | (Silvestri 1939)                                                                                                                                                                                                                   |
|           |       | <i>Eriopeltis</i>          | <i>festucae</i>               | Grass                                                                                                                                                                              | California, USA                                                                                                            | 2                                 | (Patch 1905)                                                                                                                                                                                                                       |
|           |       | <i>Filippii</i>            | <i>viburni</i>                | Olive, <i>Pistacia lentiscus</i> , <i>Hedera hélix</i>                                                                                                                             | California, USA<br>Mediterranean basin                                                                                     | 2                                 | (Pellizzari 1997)                                                                                                                                                                                                                  |
|           |       | <i>Myzolecaniinae</i>      | <i>cornuparvum</i>            | Magnolia                                                                                                                                                                           | Virginia, New York, USA                                                                                                    | 1                                 | (Herrick 1931, Kosztarab 1996)                                                                                                                                                                                                     |
|           |       | <i>Pseudophilippia</i>     | <i>quaintancii</i>            | <i>Pinus taeda</i> (Loblolly pine)                                                                                                                                                 | Eastern USA                                                                                                                | 2                                 | (Clarke et al. 1989a)                                                                                                                                                                                                              |
|           |       | <i>Toumeyella</i>          | <i>liriodendri</i>            | Yellow poplar, magnolia, linden, <i>Michelia</i> , <i>Gardenia</i> , <i>Gordonia</i> , <i>Cephalanthus</i> , <i>Tilia</i>                                                          | Alabama, California, Illinois, Indiana, Kentucky, Mississippi, Ohio, Pennsylvania, Tennessee, Virginia, West Virginia, USA | 1                                 | (Burns and Donley 1970, Gill 1988, Hoover 2006, Day 2008)                                                                                                                                                                          |
|           |       |                            | <i>parvicornis</i>            | Jack pine ( <i>Pinus banksiana</i> ), Scots pine ( <i>P. sylvestris</i> ), red pine ( <i>P. resinosa</i> )<br><i>Pinus contorta</i> , <i>P. sylvestris</i>                         | Canada<br>Colorado, Nebraska, USA                                                                                          | 1<br>1                            | (Rabkin and Le Jeune 1954)<br>(Cooper and Cranshaw 2004, Clarke 2013)                                                                                                                                                              |
|           |       |                            | <i>pini</i>                   | <i>Pinus caribaea</i> var. <i>Bahamensis</i><br><i>Pinus</i> spp.                                                                                                                  | Northeastern USA<br>Maryland, North Carolina, Virginia, USA                                                                | 1<br>2                            | (Malumphy et al. 2012)<br>(Miller 1985, Clarke 2013)                                                                                                                                                                               |
|           |       |                            | <i>piniticola virginiana</i>  | <i>Pinus</i> spp.<br><i>Pinus taeda</i> L. (Loblolly pine)<br><i>Pinus sylvestris</i> , <i>Pinus mugo</i> , <i>Pinus edulis</i> , <i>Pinus nigra</i><br>Pines<br><i>Pinus</i> spp. | Georgia; Southern USA<br>Georgia, USA<br>Colorado, USA<br>California, USA<br>Virginia, USA                                 | 3-4<br>3<br>1<br>1<br>2           | (Williams and Kosztarab 1972, Hamon and Williams 1984, Clarke 2013)<br>(Clarke et al. 1989b)<br>(Cranshaw et al. 1994, Cooper and Cranshaw 2004)<br>(Kattoulas and Koehler 1965)<br>(Williams and Kosztarab 1972, Kosztarab 1997b) |
|           |       | <i>Pseudopulvinariinae</i> |                               |                                                                                                                                                                                    |                                                                                                                            | N/A                               |                                                                                                                                                                                                                                    |

<sup>a</sup> N/A, not specified.

Higher level taxonomy is based on Hodgson (1994) and Ben-Dov et al. (2015).

**Table 2. Degree-day and plant phenological indicator models for soft scale pests**

| Soft scale species                  | Degree-day models                                       |                  | Host plant <sup>a</sup>                                                                                       | Location                 | Reference(s)              |
|-------------------------------------|---------------------------------------------------------|------------------|---------------------------------------------------------------------------------------------------------------|--------------------------|---------------------------|
|                                     | Celsius degree-day, DDC<br>(Fahrenheit degree-day, DDF) | Base temperature |                                                                                                               |                          |                           |
| <i>Ceroplastes ceriferus</i>        | 843–930 DDC                                             | 12.78°C (55°F)   | Burford holly ( <i>Ilex cornuta</i> 'Burfordii')                                                              | Athens, GA               | (Hodges and Braman 2004)  |
| <i>Eulecanium cerasorum</i>         | 1028 DDC (1851 DDF)                                     | 1.7°C (35°F)     | Sweetgum ( <i>Liquidambar styraciflua</i> )                                                                   | Lexington, KY            | (Mussey and Potter 1997)  |
|                                     | 748 DDF                                                 | 10°C (50°F)      | N/A                                                                                                           | Wooster, OH              | (Herms 2004)              |
|                                     | 818 DDC                                                 | 4.4°C (40°F)     | Hackberry ( <i>Celtis occidentalis</i> ); Norway maple ( <i>Acer platanoides</i> )                            | Lexington, KY            | (Hubbard and Potter 2005) |
| <i>Neolecanium cornuparvum</i>      | 1938 DDF                                                | 10°C (50°F)      | N/A                                                                                                           | Wooster, OH              | (Herms 2004)              |
| <i>Neopulvinaria innumerabilis</i>  | 898–1321 DDC                                            | 10.56°C (51°F)   | Red oak ( <i>Quercus falcata</i> )                                                                            | Athens, GA               | (Hodges and Braman 2004)  |
|                                     | 930 DDF                                                 | 10°C (50°F)      | N/A                                                                                                           | Midland, MI              | (Herms 2004)              |
| <i>Parthenolecanium corni</i>       | 1100–1582 DDC                                           | 10.56°C (51°F)   | Pin oak ( <i>Quercus palustris</i> ); willow oak ( <i>Quercus phellos</i> ); red maple ( <i>Acer rubrum</i> ) | Athens, GA               | (Hodges and Braman 2004)  |
|                                     | 1198–1263 DDC                                           | 12.78°C (55°F)   | Pin oak; willow oak; red maple                                                                                | Athens, GA               | (Hodges and Braman 2004)  |
| <i>Parthenolecanium fletcheri</i>   | 1073 DDF                                                | 10°C (50°F)      | N/A                                                                                                           | Midland, MI              | (Herms 2004)              |
|                                     | 767 DDF                                                 | 10°C (50°F)      | N/A                                                                                                           | Wooster, OH              | (Herms 2004)              |
|                                     | 884 DDF                                                 | 10°C (50°F)      | N/A                                                                                                           | Midland, MI              | (Herms 2004)              |
| <i>Pulvinaria acericola</i>         | 1044 DDC (1879 DDF)                                     | 4.4°C (40°F)     | Red maple                                                                                                     | Lexington, KY            | (Mussey and Potter 1997)  |
| <i>Pulvinaria floccifera</i>        | 892–1229 DDC                                            | 10.56°C (51°F)   | Red maple                                                                                                     | Athens, GA               | (Hodges and Braman 2004)  |
|                                     | 1422–1941 DDC                                           | 10.56°C (51°F)   | Burford holly                                                                                                 | Athens, GA               | (Hodges and Braman 2004)  |
| <i>Physokermes piceae</i>           | 851 DDF                                                 | 10°C (50°F)      | N/A                                                                                                           | Wooster, OH              | (Herms 2004)              |
|                                     | 1154 DDF                                                | 10°C (50°F)      | N/A                                                                                                           | Midland, MI              | (Herms 2004)              |
| <i>Toumeyella liriodendri</i>       | 894 DDF                                                 | 10°C (50°F)      | N/A                                                                                                           | Wooster, OH              | (Herms 2004)              |
|                                     | 532–616 DDC                                             | 10.56°C (51°F)   | Tulip poplar ( <i>Liriodendron tulipifera</i> )                                                               | Athens, GA               | (Hodges and Braman 2004)  |
| <i>Toumeyella pini</i>              | 783 DDF                                                 | 10°C (50°F)      | N/A                                                                                                           | Wooster, OH              | (Herms 2004)              |
| Plant phenological indicator models |                                                         |                  |                                                                                                               |                          |                           |
| Soft scale species                  | Plant species                                           |                  | Phenophase                                                                                                    | Location                 | References                |
| <i>Eulecanium cerasorum</i>         | Northern catalpa ( <i>Catalpa speciosa</i> )            |                  | First bloom                                                                                                   | Lexington, KY            | (Mussey and Potter 1997)  |
|                                     | Washington hawthorne ( <i>Crataegus phaenopyrum</i> )   |                  | 50% bloom                                                                                                     | Lexington, KY            | (Mussey and Potter 1997)  |
| <i>Pulvinaria innumerabilis</i>     | Washington hawthorne                                    |                  | Full bloom                                                                                                    | Wooster, OH              | (Herms 2004)              |
|                                     | Tulip poplar                                            |                  | Beginning to bloom; 50% bloom                                                                                 | Athens, GA               | (Hodges and Braman 2004)  |
| <i>Parthenolecanium corni</i>       | Northern catalpa                                        |                  | Full bloom                                                                                                    | Midland, MI              | (Herms 2004)              |
|                                     | Oakleaf hydrangea                                       |                  | First bloom                                                                                                   | Wooster, OH              | (Herms 2004)              |
| <i>Parthenolecanium fletcheri</i>   | Oak leaf hydrangea ( <i>Hydrangea quercifolia</i> )     |                  | Full bloom                                                                                                    | Athens, GA               | (Hodges and Braman 2004)  |
|                                     | American elder ( <i>Sambucus canadensis</i> )           |                  | Full bloom                                                                                                    | Midland, MI              | (Herms 2004)              |
| <i>Parthenolecanium fletcheri</i>   | Washington hawthorne                                    |                  | Full bloom                                                                                                    | Wooster, OH              | (Herms 2004)              |
|                                     | American elder                                          |                  | First bloom                                                                                                   | Midland, MI              | (Herms 2004)              |
| <i>Pulvinaria acericola</i>         | Littleleaf linden ( <i>Tilia cordata</i> )              |                  | 95% bloom                                                                                                     | Lexington, KY            | (Mussey and Potter 1997)  |
|                                     | Tulip poplar                                            |                  | Beginning to bloom                                                                                            | Athens, GA               | (Hodges and Braman 2004)  |
| <i>Physokermes piceae</i>           | Oak leaf hydrangea                                      |                  | Beginning to bloom                                                                                            | Athens, GA               | (Hodges and Braman 2004)  |
|                                     | Golden-rain tree ( <i>Koelreuteria paniculata</i> )     |                  | First bloom                                                                                                   | Midland, MI; Wooster, OH | (Herms 2004)              |
| <i>Toumeyella liriodendri</i>       | Littleleaf linden 'Greenspire'                          |                  | First Bloom                                                                                                   | Wooster, OH              | (Herms 2004)              |
|                                     | American elder                                          |                  | Full bloom                                                                                                    | Wooster, OH              | (Herms 2004)              |
|                                     | Bumald spirea ( <i>Spirea x bumalda</i> )               |                  | Full bloom                                                                                                    | Wooster, OH              | (Herms 2004)              |
| <i>Toumeyella liriodendri</i>       | Honeysuckle ( <i>Lonicera</i> sp.)                      |                  | Beginning to bloom                                                                                            | Athens, GA               | (Hodges and Braman 2004)  |
|                                     | Flowering dogwood ( <i>Cornus florida</i> )             |                  | Beginning to bloom, or 50% bloom                                                                              | Athens, GA               | (Hodges and Braman 2004)  |
| <i>Toumeyella pini</i>              | Snowball viburnum ( <i>Viburnum macrocephalum</i> )     |                  | 50% bloom                                                                                                     | Athens, GA               | (Hodges and Braman 2004)  |
|                                     | Washington hawthorne                                    |                  | Full bloom                                                                                                    | Wooster, OH              | (Herms 2004)              |

The models predict crawler emergence or egg hatch. Starting date of the degree-day models was 1 January. Degree-day approximation method used by Herms (2004) was not specified, whereas that used by the other studies was single-sine or sine-wave method.

<sup>a</sup> N/A, not specified.

elm (*Ulmus americana* L.) cultivars supported a larger population of *P. corni* and *Neopulvinaria innumerabilis* (Rathvon) than Asian elm (*U. parvifolia* Jacq. and *U. propinqua* Koidz.) cultivars. Kozár (1972) found that 10 peach (*Prunus persica* (L.) Stokes) varieties were highly susceptible to infestation by *P. corni*, whereas nine were either lightly infested or not infested. Host plant resistance to scale insects is likely conferred by an interaction between plant genetic, physiology, and biochemistry (McClure 1985).

### Biological Control

Many hymenopteran parasitoids of soft scale are members of Aphelinidae, Encyrtidae, Eulophidae, and Pteromalidae (Hayat 1997, Prinsloo 1997, Viggiani 1997, Kapranas and Tena 2015). Major predators of soft scales include beetles [Coccinellidae, Anthribidae (*Anthribus* spp.), and Nitidulidae (*Cybocephalus* spp.); Ponsonby and Copland 1997, Hodek and Honek 2009] and neuropterans (Chrysopidae, Hemerobiidae, Coniopterygidae, and Raphidiidae;

**Table 3. Crawler emergence time of soft scale pests**

| Species                            | Time of the year                                                                                                                                                                                                                                                                                                  | Location                                                                                                                                                                 | Host cited in the references <sup>a</sup>                                                                                                                                                               | References                                                                                                                                                                                        |
|------------------------------------|-------------------------------------------------------------------------------------------------------------------------------------------------------------------------------------------------------------------------------------------------------------------------------------------------------------------|--------------------------------------------------------------------------------------------------------------------------------------------------------------------------|---------------------------------------------------------------------------------------------------------------------------------------------------------------------------------------------------------|---------------------------------------------------------------------------------------------------------------------------------------------------------------------------------------------------|
| <i>Ceroplastes albolineatus</i>    | Mar. (1st generation)<br>Sept. (2nd generation)                                                                                                                                                                                                                                                                   | Mexico D.F., Mexico                                                                                                                                                      | <i>Pittocaulon praecox</i>                                                                                                                                                                              | (Narada and Lechuga 1971)                                                                                                                                                                         |
| <i>Ceroplastes ceriferus</i>       | Late-April<br>Late-May to mid-June<br><br>June to mid-July<br>June                                                                                                                                                                                                                                                | Texas, USA<br>Athens, Georgia, USA<br><br>Pennsylvania, USA<br>Maryland, Tennessee, USA                                                                                  | Various<br>Burford holly ( <i>Ilex cornuta</i><br>"Burfordii")<br><br>Various<br>Various                                                                                                                | (Johnson and Lyon 1991)<br>(Hodges and Braman 2004)<br><br>(Hoover et al. 2011)<br>(Smith et al. 1971, Klingeman et al. 2002)<br>(New Jersey Department of Agriculture [NJDA] 2006)<br>(Lai 1993) |
| <i>Ceroplastes cirripediformis</i> | Mid-June<br>Early Sept. to mid-Oct.<br>Early-Feb. (1st generation)<br><br>Early-June (2nd generation)<br>Early-Oct. (3rd generation)<br>Late Feb. to early-Mar.                                                                                                                                                   | New Jersey, USA<br>Northern Guizhou, China<br>Peru<br><br>Chile                                                                                                          | N/A<br>Tea<br>Passion fruit ( <i>Passiflora edulis</i> )<br><br>Various fruit trees                                                                                                                     | (Marín-Loayza and Cisneros-Vera 1996)<br><br>(Bayer CropScience Chile 2014)<br>(Kondo Rodríguez 2009)                                                                                             |
| <i>Ceroplastes destructor</i>      | Early-April<br><br>Late April<br>Early-Dec.<br><br>Nov.<br>Mid-Oct. (1st generation)<br>Early-April (2nd generation)<br>Mid-Nov.                                                                                                                                                                                  | Palmira, Valle del Cauca, Colombia<br>Texas, USA<br>Kerikeri, New Zealand<br><br>New South Whales, Australia<br>Queensland, Australia<br><br>Cape Province, South Africa | Various<br>Seminole tangelo ( <i>Citrus paradisi</i> x <i>C. reticulata</i> )<br>Citrus ( <i>Citrus</i> spp.)<br>Citrus<br><br><i>Citrus reticulata</i> , <i>Syzygium malaccensis</i>                   | (Johnson and Lyon 1991)<br>(Olson et al. 1993)<br><br>(Snowball 1969)<br>(Smith 1970)<br><br>(Wakgari and Giliomee 2000)                                                                          |
| <i>Ceroplastes floridensis</i>     | Early-June<br>Early-Jan. (1st generation)<br><br>Early-May (2nd generation)<br>Early-Oct. (3rd generation)<br>Early Feb. (1st generation)<br>Mid-Aug. (2nd generation)<br>May (1st generation)<br>Aug. (2nd generation)<br>April-May (1st generation)<br>July-Aug. (2nd generation)<br>Oct.-Nov. (3rd generation) | Daegu, South Korea<br>Peru<br><br>Egypt<br><br>Israel<br><br>Florida, USA                                                                                                | Persimmon<br>Orange, passion fruit ( <i>Passiflora edulis</i> )<br><br>Banana<br><br>Mango<br><br>Avocado, citrus, crape myrtle,<br>deodar cedar, elm, holly,<br>Indian hawthorn, loblolly<br>pine, oak | (Han and Lee 1964)<br>(Marín-Loayza and Cisneros-Vera 1996)<br><br>(Abd-Elhalim Moharum 2011)<br><br>(Swirski and Greenberg 1972)<br><br>(Johnson and Lyon 1991)                                  |
|                                    | May-June (1st generation)<br>Nov. (2nd generation)<br>Late April-May (1st generation)<br>Late July-Aug. (2nd generation)<br>April (1st generation)<br>Aug. (2nd generation)                                                                                                                                       | Tifton, Georgia, USA<br>Texas, USA<br><br>Fujian Province, China                                                                                                         | <i>Ilex</i> spp.<br>N/A<br><br><i>Cinnamomum japonicum</i>                                                                                                                                              | (Hodges et al. 2001)<br>(Drees et al. 2005)<br><br>(Kaiju 2011)                                                                                                                                   |
| <i>Ceroplastes japonicus</i>       | Mid-May<br>Early-June<br>June                                                                                                                                                                                                                                                                                     | Croatia<br>Korea<br>Italy                                                                                                                                                | Various<br>N/A<br>Bay laurel and maple                                                                                                                                                                  | (Masten-Milek et al. 2007)<br>(Davis et al. 2005)<br>(Pellizzari and Camporese 1994)                                                                                                              |
| <i>Ceroplastes pseudoceriferus</i> | Mid-June<br>Late-Jun. (1st generation)<br>Late-Sept. (2nd generation)<br>Late-Mar. (3rd generation)                                                                                                                                                                                                               | Korea<br>Southern Taiwan,<br>Republic of China                                                                                                                           | Persimmon<br>Lychee, mango                                                                                                                                                                              | (Park et al. 1990)<br>(Wen and Lee 1986)                                                                                                                                                          |
| <i>Ceroplastes rubens</i>          | June, July<br>Mid-Sept. (1st generation)<br>Feb. (2nd generation)                                                                                                                                                                                                                                                 | Japan<br>Queensland, Australia                                                                                                                                           | Citrus, persimmon<br>Various                                                                                                                                                                            | (Itioka and Inoue 1991)<br>(QDAFF 2014)                                                                                                                                                           |
| <i>Ceroplastes rusci</i>           | Early-May (1 <sup>st</sup> generation)<br>Aug. (2nd generation)<br>Late May to Early-June (1st generation)<br>Late Aug. to early Sept. (2nd generation)                                                                                                                                                           | Italy<br><br>Extremadura, Spain                                                                                                                                          | Fig tree<br><br>Fig tree                                                                                                                                                                                | (Inserra 1970)<br><br>(De la Cruz Blanco et al. 2010)                                                                                                                                             |
| <i>Ceroplastes sinensis</i>        | Feb.<br>Late-June<br>Early-July<br>Nov.<br>June-July                                                                                                                                                                                                                                                              | Northland, New Zealand<br>Virginia, USA<br>Central Greece<br>New South Wales, Australia<br>Northern Spain                                                                | Citrus<br><i>Ilex</i> spp.<br><i>Citrus sinensis</i><br>Citrus<br><i>Citrus reticulata</i> , <i>C. sinensis</i>                                                                                         | (Lo et al. 1996)<br>(Kosztarab 1996)<br>(Stathas et al. 2003a)<br>(Snowball 1970)<br>(Martínez-Ferrer et al. 2015)                                                                                |
| <i>Coccus hesperidum</i>           | Dec. and Jan.                                                                                                                                                                                                                                                                                                     | Chile                                                                                                                                                                    | Various fruit trees                                                                                                                                                                                     | (Bayer CropScience Chile 2014)                                                                                                                                                                    |
| <i>Coccus pseudomagnoliarum</i>    | April                                                                                                                                                                                                                                                                                                             | Davis, California, USA                                                                                                                                                   | Chinese hackberry ( <i>Celtis sinensis</i> )                                                                                                                                                            | (Dreidstadt 2004)                                                                                                                                                                                 |

(continued)



Table 3. Continued

| Species                            | Time of the year                      | Location                      | Host cited in the references <sup>a</sup>                                                                                                                                           | References                                          |
|------------------------------------|---------------------------------------|-------------------------------|-------------------------------------------------------------------------------------------------------------------------------------------------------------------------------------|-----------------------------------------------------|
| <i>Coccus viridis</i>              | June                                  | Greece                        | Citrus                                                                                                                                                                              | (Argyriou and Ioannides 1975)                       |
|                                    | June                                  | Italy                         | Citrus                                                                                                                                                                              | (Barbagallo 1974)                                   |
|                                    | June                                  | Spain                         | Citrus                                                                                                                                                                              | (Tena and Garcia-Mari 2008)                         |
|                                    | June                                  | California, USA               | Citrus                                                                                                                                                                              | (Bernal et al. 2001)                                |
| <i>Didesmococcus unifasciatus</i>  | Sept.                                 | South Florida                 | Various                                                                                                                                                                             | (Fredrick 1943)                                     |
| <i>Eulecanium caryae</i>           | Early June                            | Central Asia                  | Stone fruits                                                                                                                                                                        | (Babayan 1973)                                      |
|                                    | Mid-May to mid-June                   | Ohio, USA                     | N/A                                                                                                                                                                                 | (Shetlar 2002)                                      |
| <i>Eulecanium cerasorum</i>        | Late-June                             | Michigan, USA                 | Beech, willow, birch                                                                                                                                                                | (Wallner 1969)                                      |
|                                    | May                                   | Tennessee, USA                | Apple, buckeye, dogwood, elm, locust, maple, pear                                                                                                                                   | (Klingeman et al. 2002)                             |
|                                    | Late-May                              | Kentucky, USA                 | Sweetgum ( <i>Liquidambar styraciflua</i> ), hackberry ( <i>Celtis occidentalis</i> ), sugar maple ( <i>Acer saccharum</i> ), Norway maple ( <i>Acer platanoides</i> ), honeylocust | (Mussey and Potter 1997, Hubbard and Potter 2005)   |
|                                    | Late-May to early-June                | California, USA               | Pear                                                                                                                                                                                | (Madsen and Barnes 1959)                            |
|                                    | June to early-July                    | Pennsylvania, USA             | Crabapple, dogwood, elm, maple, honeylocust, Japanese zelcova, pear, sweetgum, <i>Wisteria</i> spp.                                                                                 | (Hoover et al. 2011)                                |
|                                    |                                       | New Jersey and Midwestern USA | Various                                                                                                                                                                             | (Krischik and Davidson 2003, Herms 2004, NJDA 2006) |
| <i>Eulecanium kunoense</i>         | Early to mid-May (females)            | Walnut Creek, California, USA | Various                                                                                                                                                                             | (Madsen 1962)                                       |
|                                    | March (males)                         |                               |                                                                                                                                                                                     |                                                     |
| <i>Eulecanium tiliae</i>           | Late-May to Mid-June                  | Armenia, Eurasia              | Apple, pear, plum; broad-leaved trees and shrubs                                                                                                                                    | (Babayan 1976)                                      |
| <i>Lichtensia viburni</i>          | Early to mid-June (1st generation)    | Mediterranean basin           | Olive, <i>Pistacia lentiscus</i> , <i>Hedera helix</i>                                                                                                                              | (Pellizzari 1997)                                   |
|                                    | Mid-Aug. (2nd generation)             |                               |                                                                                                                                                                                     |                                                     |
| <i>Mesolecanium nigrofasciatum</i> | Mid-May to mid-June                   | Ohio, USA                     | Various                                                                                                                                                                             | (Shetlar 2002)                                      |
|                                    | Late May to early June                | North Carolina, USA           | Blueberry                                                                                                                                                                           | (Meyer et al. 2001)                                 |
|                                    | June                                  | Pennsylvania, USA             | Peach, sycamore                                                                                                                                                                     | (Simanton 1916, Hoover et al. 2011)                 |
| <i>Neolecanium cornuparvum</i>     | June                                  | New Jersey, USA               | N/A                                                                                                                                                                                 | (NJDA 2006)                                         |
|                                    | May, Aug.                             | New Jersey, USA               | N/A                                                                                                                                                                                 | (NJDA 2006)                                         |
|                                    | July, Sept.                           | New York, USA                 | <i>Magnolia</i> spp.                                                                                                                                                                | (Herrick 1931)                                      |
|                                    | Late-July to early-Aug.               | Ohio, USA                     | <i>Magnolia</i> spp.                                                                                                                                                                | (Herms 2004)                                        |
|                                    | Late-Aug.                             | Pennsylvania, USA             | <i>Magnolia</i> spp.                                                                                                                                                                | (Hoover et al. 2011)                                |
|                                    | Late-Aug. and Sept.                   | Michigan, USA                 | <i>Magnolia</i> spp.                                                                                                                                                                | (Wallner 1969)                                      |
| <i>Neopulvinaria innumerabilis</i> | Early-Sept.                           | Virginia, USA                 | <i>Magnolia</i> spp.                                                                                                                                                                | (Koztarab 1996)                                     |
|                                    | May                                   | Tennessee, USA                | Alder, ash, beech, boxwood, dogwood, elm, lilac, linden, locust, maple, oak                                                                                                         | (Klingeman et al. 2002)                             |
|                                    | Mid to late-May                       | Athens, Georgia, USA          | Red oak                                                                                                                                                                             | (Hodges and Braman 2004)                            |
|                                    | Early-June                            | Virginia, USA                 | Various                                                                                                                                                                             | (Day 2008)                                          |
|                                    | Mid-June                              | Colorado, New Jersey, USA     | Various hardwoods                                                                                                                                                                   | (Cranshaw et al. 1994, NJDA 2006)                   |
|                                    | Mid-June to mid-July                  | Pennsylvania, USA             | Maple, pear                                                                                                                                                                         | (Hoover et al. 2011)                                |
|                                    | Mid-June to early-July                | Midwestern USA                | Maple, honey locust, linden ( <i>Tilia</i> spp.)                                                                                                                                    | (Krischik and Davidson 2003)                        |
| <i>Parasaissetia nigra</i>         | Dec. and Jan.                         | California, USA               | Various                                                                                                                                                                             | (Smith 1944)                                        |
| <i>Parthenolecaium corni</i>       | May (partial 2nd)                     |                               |                                                                                                                                                                                     |                                                     |
|                                    | May                                   | Tennessee, USA                | Fruit trees and ornamental plants                                                                                                                                                   | (Klingeman et al. 2002)                             |
|                                    | Late-May to mid-June(1st generation)  | Athens, Georgia, USA          | Pin oak ( <i>Quercus palustris</i> ), red maple ( <i>Acer rubrum</i> ), willow oak ( <i>Q. phellos</i> )                                                                            | (Hodges and Braman 2004)                            |
|                                    | Early autumn (2nd generation)         |                               |                                                                                                                                                                                     |                                                     |
|                                    | Late May to early-July                | California, USA               | Broom (tribe Genisteae)                                                                                                                                                             | (Birjandi 1981)                                     |
|                                    | Early-June                            | Virginia, USA                 | Various                                                                                                                                                                             | (Day 2008)                                          |
|                                    | June and July                         | Midwestern USA                | Various                                                                                                                                                                             | (Krischik and Davidson 2003, Herms 2004)            |
|                                    | Mid-June                              | New Jersey, USA               | N/A                                                                                                                                                                                 | (NJDA 2006)                                         |
|                                    | Mid-June to mid-July (1st generation) | Pennsylvania, USA             | Various                                                                                                                                                                             |                                                     |
|                                    | Mid-Aug. (2nd generation)             |                               |                                                                                                                                                                                     | (Asquith 1949, Hoover et al. 2011)                  |
|                                    | Mid-July                              | California, USA               | Pear, elm                                                                                                                                                                           | (Essig 1915, Madsen and Barnes 1959)                |
|                                    | Oct. to early-Nov. (1st generation)   | Chile                         | Grapes                                                                                                                                                                              | (Bayer CropScience Chile 2014)                      |
| <i>Parthenolecanium fletcheri</i>  | Jan. (2nd generation)                 |                               |                                                                                                                                                                                     |                                                     |
|                                    | Early-June                            | Virginia, USA                 | Arborvitae, yew, pachysandra, eastern red cedar                                                                                                                                     | (Day 2008)                                          |

(continued)

Table 3. Continued

| Species                                                                                                                                    | Time of the year                                                                                               | Location                                                                | Host cited in the references <sup>a</sup>                                                                                 | References                                                                 |
|--------------------------------------------------------------------------------------------------------------------------------------------|----------------------------------------------------------------------------------------------------------------|-------------------------------------------------------------------------|---------------------------------------------------------------------------------------------------------------------------|----------------------------------------------------------------------------|
| <i>Parthenolecanium fletcheri</i>                                                                                                          | June                                                                                                           | Pennsylvania, USA                                                       | Arborvitae ( <i>Thuja</i> spp.), yew                                                                                      | (Hoover 2006)                                                              |
|                                                                                                                                            | Mid to late-June                                                                                               | Midwestern USA                                                          | Various                                                                                                                   | (Krischik and Davidson 2003, Herms 2004)                                   |
| <i>Parthenolecanium orientale</i><br><i>Parthenolecanium persicae</i>                                                                      | Late June                                                                                                      | Central Europe                                                          | <i>Cupressus</i> , <i>Juniperus</i><br><i>Platycladus</i> , <i>Thuja</i> , <i>Tsuga</i>                                   | (Malumphy et al. 2011)                                                     |
|                                                                                                                                            | July, mid-Aug.                                                                                                 | New Jersey, USA                                                         | N/A                                                                                                                       | (NJDA 2006)                                                                |
|                                                                                                                                            | Mid-May                                                                                                        | China                                                                   | Grapevine ( <i>Vitis vinifera</i> )                                                                                       | (Li 2004)                                                                  |
|                                                                                                                                            | Early-May                                                                                                      | Southern Greece                                                         | Grapevine                                                                                                                 | (Stathas et al. 2003b)                                                     |
|                                                                                                                                            | Mid-May to mid-June                                                                                            | Ohio, USA                                                               | Various                                                                                                                   | (Shetlar 2002)                                                             |
| <i>Parthenolecanium pruinosum</i><br><i>Parthenolecanium quercifex</i><br><i>Parthenolecanium rufulum</i><br><i>Physokermes hemicyphus</i> | Late-July                                                                                                      | Henrico County, Virginia, USA                                           | Barberry                                                                                                                  | (Kosztarab 1996)                                                           |
|                                                                                                                                            | Mid-Nov.                                                                                                       | Chile                                                                   | Fruit trees                                                                                                               | (Bayer CropScience Chile 2014)                                             |
| <i>Physokermes piceae</i>                                                                                                                  | Late-May to June                                                                                               | California, USA                                                         | Walnut                                                                                                                    | (Michelbacher 1955)                                                        |
|                                                                                                                                            | Late-May                                                                                                       | Virginia, USA                                                           | Oaks, hickory, birch                                                                                                      | (Schultz 1984)                                                             |
| <i>Protopulvinaria pyriformis</i>                                                                                                          | Late-May                                                                                                       | Northeastern Italy                                                      | English oak ( <i>Quercus robur</i> )                                                                                      | (Rainato and Pellizzari 2009)                                              |
|                                                                                                                                            | Late-July                                                                                                      | Greece                                                                  | <i>Abies cephalonica</i> , <i>A. borisii regis</i>                                                                        | (Gounari et al. 2012)                                                      |
| <i>Pulvinaria acericola</i>                                                                                                                | Mid-June                                                                                                       | Wooster, Ohio, USA                                                      | N/A                                                                                                                       | (Herms 2004)                                                               |
|                                                                                                                                            | Late-June                                                                                                      | Colorado, USA                                                           | Spruce                                                                                                                    | (Cranshaw et al. 1994)                                                     |
| <i>Pulvinaria amygdali</i><br><i>Pulvinaria floccifera</i>                                                                                 | April (males)<br>May (females)                                                                                 | Florida, USA                                                            | Avocado                                                                                                                   | (Moznette 1922)                                                            |
|                                                                                                                                            | Late-May to Early-June                                                                                         | Virginia, USA                                                           | Maple, dogwood, holly, andromeda, gum                                                                                     | (Day 2008)                                                                 |
| <i>Pulvinaria hydrangeae</i>                                                                                                               | June to early-July                                                                                             | Pennsylvania, USA                                                       | Azalea                                                                                                                    | (Hoover et al. 2011)                                                       |
|                                                                                                                                            | June 8 to 14                                                                                                   | Lexington, Kentucky, USA                                                | Red maple                                                                                                                 | (Mussey and Potter 1997)                                                   |
|                                                                                                                                            | Mid-June                                                                                                       | New York State, USA                                                     | Peach, plum, quince                                                                                                       | (Harman 1927)                                                              |
|                                                                                                                                            | Late-May and June                                                                                              | Pennsylvania, USA                                                       | Holly, ivy, <i>Taxus</i> spp.                                                                                             | (Hoover et al. 2011)                                                       |
|                                                                                                                                            | Early-June                                                                                                     | Virginia, USA                                                           | Camellia, holly, <i>Taxus</i> spp., rhododendron, hydrangea, maple, English ivy                                           | (Day 2008)                                                                 |
| <i>Pulvinaria polygona</i><br><i>Pulvinaria psidii</i>                                                                                     | Mid-June                                                                                                       | New Jersey                                                              | N/A                                                                                                                       | (NJDA 2006)                                                                |
|                                                                                                                                            | Mid to late-June<br>June                                                                                       | Athens, Georgia, USA<br>Tennessee, USA                                  | Burford holly, Bradford pear<br><i>Callicarpa</i> spp., <i>Camellia</i> spp., holly, hydrangea, maple, yew                | (Hodges and Braman 2004)<br>(Klingeman et al. 2002)                        |
| <i>Pulvinaria rhois</i><br><i>Pulvinaria vitis</i>                                                                                         | Late-June to early-July<br>Mid-July to late-June                                                               | Connecticut, Rhode Island, USA<br>Guilan and Mazandaran provinces, Iran | Various<br>Citrus, <i>Taxus baccata</i> ,<br><i>Pittosporum toriba</i> , <i>Ilex aquifolia</i> , <i>Camellia sinensis</i> | (Westcott 1973)<br>(Hallaji-Sani et al. 2012)                              |
|                                                                                                                                            | July                                                                                                           | Europe; Australia; New Zealand; USA                                     | Various                                                                                                                   | (Alford 2007)                                                              |
| <i>Pulvinaria mesembrianthemii</i><br><i>Rhodococcus turanicus</i>                                                                         | March                                                                                                          | India                                                                   | Mango, citrus                                                                                                             | (Chatterji and Datta 1974)                                                 |
|                                                                                                                                            | Early-April (1st generation)<br>Mid-June to early-July (2nd generation)<br>Early to mid-Sept. (3rd generation) | Egypt                                                                   | Guava                                                                                                                     | (Baker et al. 2012)                                                        |
| <i>Sphaerolecanium prunastris</i>                                                                                                          | Mid-April                                                                                                      | California, USA                                                         | Prune, apple, peach, plum                                                                                                 | (Essig 1915)                                                               |
|                                                                                                                                            | Late-May                                                                                                       | Germany; former Soviet Union                                            | Various                                                                                                                   | (Schmutterer 1952, Borchsenius 1957)                                       |
| <i>Toumeyella liriodendri</i>                                                                                                              | Early to mid-June                                                                                              | Ontario, Canada                                                         | Peach                                                                                                                     | (Phillips 1963)                                                            |
|                                                                                                                                            | July–Aug.                                                                                                      | Pacific Northwest USA                                                   | Grape                                                                                                                     | (Hollingsworth 2014)                                                       |
| <i>Rhodococcus turanicus</i>                                                                                                               | Early-May                                                                                                      | Oakland, California, USA                                                | Ice plant ( <i>Carpobrotus</i> sp.)                                                                                       | (Washburn and Frankie 1981)                                                |
|                                                                                                                                            | Late-May                                                                                                       | El Cerrito, California, USA                                             |                                                                                                                           |                                                                            |
| <i>Sphaerolecanium prunastris</i>                                                                                                          | Mid-May                                                                                                        | Armenia                                                                 | Stone fruits                                                                                                              | (Babayan 1986)                                                             |
|                                                                                                                                            | Mid-May                                                                                                        | Eastern Spain                                                           | Citrus, olive                                                                                                             | (Bibolini 1958, Argyriou 1963, Peleg 1965, Nuzzaci 1969b, De Freitas 1972) |
| <i>Sphaerolecanium prunastris</i>                                                                                                          | Sept.–Nov. (partial 2nd generation)                                                                            | Eastern Spain                                                           | Citrus, olive                                                                                                             | (Briaies and Campos 1986, Noguera et al. 2003, Tena et al. 2007)           |
|                                                                                                                                            | June to July (for 1 generation)                                                                                | Eastern Spain                                                           | Citrus, olive                                                                                                             | (Panis 1977b, Llorens-Climent 1984, Noguera et al. 2003)                   |
| <i>Sphaerolecanium prunastris</i>                                                                                                          | Mar. to Oct. (for 2 generations)<br>Oct.–Nov.                                                                  | Argentina, Chile, Peru, southern Australia                              | Various fruit trees                                                                                                       | (Simmonds 1951, García 1969, González and Lambrot 1989)                    |
|                                                                                                                                            | Mid-May to mid-June<br>June                                                                                    | Ohio, USA<br>Pennsylvania, USA                                          | Various<br>Purpleleaf plum, <i>Pyracantha</i> spp.                                                                        | (Shetlar 2002)<br>(Hoover et al. 2011)                                     |
| <i>Toumeyella liriodendri</i>                                                                                                              | Aug.                                                                                                           | New Jersey, Pennsylvania, Tennessee, USA                                | Tulip tree, magnolia, linden                                                                                              | (Klingeman et al. 2002, NJDA 2006, Hoover et al. 2011)                     |
|                                                                                                                                            | Sept.<br>Late Aug. to Sept.                                                                                    | Virginia, USA<br>Midwestern USA                                         | Tulip tree, magnolia<br>Tulip tree, magnolia, basswood, buttonbush, hickory, linden, redbud, walnut                       | (Day 2008)<br>(Krischik and Davidson 2003)                                 |

(continued)

**Table 3. Continued**

| Species                       | Time of the year                     | Location                                | Host cited in the references <sup>a</sup>                                                 | References                              |
|-------------------------------|--------------------------------------|-----------------------------------------|-------------------------------------------------------------------------------------------|-----------------------------------------|
| <i>Toumeyella parvicornis</i> | June to early-July (in 1 generation) | Colorado and Nebraska, USA              | <i>Pinus</i> spp.                                                                         | (Clarke 2013)                           |
|                               | May to late-July (in 2 generations)  | Maryland, Virginia, North Carolina, USA | <i>Pinus</i> spp.                                                                         | (Clarke 2013)                           |
| <i>Toumeyella pini</i>        | Late May to Early-June               | Colorado, USA                           | <i>Pinus sylvestris</i> , <i>Pinus mugo</i> ,<br><i>Pinus edulis</i> , <i>Pinus nigra</i> | (Cranshaw et al. 1994)                  |
|                               | Mid-June to mid-July                 | Pennsylvania, USA                       | <i>Pinus</i> spp.                                                                         | (Hoover et al. 2011)                    |
| <i>Toumeyella pinicola</i>    | June 20                              | Wooster, Ohio, USA                      | N/A                                                                                       | (Herms 2004)                            |
|                               | Feb.                                 | Southern California, USA                | <i>Pinus</i> spp.                                                                         | (Dreistadt 2004)                        |
|                               | Mid-April to mid-May.                | San Mateo Co., California, USA          | <i>Pinus</i> spp.                                                                         | (Kattoulas and Koehler 1965)            |
|                               | Late April                           | San Francisco Bay area, California, USA | <i>Pinus</i> spp.                                                                         | (Dreistadt 2004)                        |
|                               | Aug. (males)                         | San Mateo Co., California, USA          | <i>Pinus</i> spp.                                                                         | (Kattoulas and Koehler 1965, Gill 1988) |

<sup>a</sup> N/A, not specified.

Miller et al. 2004, Ben-Dov et al. 2015, Oswald 2014). Other beetles, hemipterans, thrips, flies, caterpillars, mites, and spiders are occasional or opportunistic predators of soft scales (Clausen 1978, Kosztarab 1996, Harris 1997, Ponsonby and Copland 1997, Hodges and Braman 2004, Rakimov et al. 2015).

Resident natural enemies kill many soft scales in the outdoor environment. Two encyrtid, two pteromalid, and one aphelinid parasitoid species were responsible for 10–60% mortality in *P. quercifex* population (Schultz 1984). Three aphelinid, nine encyrtid, one eulophid, and one pteromalid species contributed up to 37.5 and 4.5% mortality in nymph and adult *Eulecanium cerasorum* (Cockerell), respectively, whereas *Hyperaspis* sp. (Coccinellidae) reduced crawler abundance by 47.6% (Hubbard and Potter 2005). *Anthrribus nebulosus* (Forster) (Anthrribidae) reduced *Physokermes inopinatus* Danzig and Kozár population by 55% and *Physokermes piceae* (Schrank) population by 59% (Kosztarab and Kozár 1983), whereas *Anthrribus niveovariegatus* Reolofs reduced *E. pela* population by 75% (Deng 1985). Where spiders were left undisturbed, *C. floridensis* population was below damaging level (Mansour and Whitecomb 1986). Parasitoids, predators, entomopathogenic fungi, leaf abscission, and rainfall resulted in 96% mortality in *C. viridis* populations (Rosado et al. 2014). Insecticide treatment against *P. corni* on fruit trees in California's Central Valley can be omitted if a large (but unspecified) number of scale insects are parasitized in the summer (Bentley and Day 2010).

Conserving existing natural enemy populations is an important strategy in managing soft scale pests. Studies are needed to assess the mechanism, adoption, and effectiveness of habitat manipulation, which include provision of alternative food sources, alternative prey or hosts, shelter and favorable microclimatic conditions (Landis et al. 2000), for soft scale management. In the only relevant study to date, Paredes et al. (2015) reported that the presence of ground cover, which increased vegetation diversity and natural enemy shelter, did not reduce *S. oleae* abundance in Spanish olive groves.

Using selective or compatible insecticides that minimally affect natural enemy survival and behavior also can conserve their populations (Ruberson et al. 1998, Raupp et al. 2001). Extensively use of broad-spectrum pyrethroids, carbamates, and organophosphates can reduce natural enemy abundance and effectiveness, and lead to scale insect pest outbreaks (McClure 1977, Raupp et al. 2001, Wakgari and Giliomee 2001, Prabhaker et al. 2007). Insect growth regulators, neonicotinoids (when applied to the soil), oil, and spirotetramat have lower impact on the survival and effectiveness of scale insect natural enemies (Sclar and Cranshaw 1996, Coll and Abd-Rabou 1998, Smith and Krischik 2000, Wakgari and Giliomee 2001, Rebek and Sadof 2003, Prabhaker et al. 2007, Frank 2012). Rebek and Sadof (2003) cautioned that the true impact of these selective, compatible, or “reduced risk” insecticides on the natural enemies of scale insects depended on the

extent scale insect abundance was reduced by the insecticides, the timing of application, the mode of contact with the insecticide residue, and the sublethal effects of these insecticides on the pests and the natural enemies; these are largely unknown for soft scale pests and their natural enemies.

Ants can interfere with foraging and reproductive behaviors of natural enemies through direct attack or incidental disturbance (Bartlett 1961, Bach 1991, Buckley and Gullan 1991, Itioka and Inoue 1996a, 1996b). Ant-exclusion increased predator abundance and reduced soft scale abundance (Vanek and Potter 2010).

Natural enemies, especially parasitoids, are successful in many classical and augmentative biological control programs (Kapranas and Tena 2015). The introduction of *Anicetus beneficus* Ishii and Yasumatsu (Encyrtidae) achieved successful control of *C. rubens* in Japanese citrus orchards within 2.5 yr (Yasumatsu 1951, 1953, 1958, 1969; Smith 1986; Takagi 2003). The introduction of *Metaphycus luteolus* (Timberlake) and *Metaphycus helvolus* (Compere) reduced *C. pseudomagnoliarum* populations in southern California (Bartlett 1978), but it was unsuccessful in the San Joaquin Valley (Gressit et al. 1954, Bartlett 1978, Kennett 1988, Kennett et al. 1995) because of mismatch of the natural enemy species with local environmental conditions (Bernal et al. 2001). Suppression of some soft scale populations may require a complex of native and introduced natural enemy species (Schweizer et al. 2002).

Although formulation and high production cost limited earlier adoption, recent advances have allowed greater use of entomopathogenic fungi in crop production (Evans and Hywel-Jones 1997). The efficacy of entomopathogenic fungi depends on appropriate environmental conditions (Evans and Hywel-Jones 1997). In humid tropical regions, *Verticillium lecanii* (Zimmermann) Viegas is the main mortality factor of *C. viridis* (Murphy 1997). Efficacy of entomopathogenic fungi also depends on pest species. More *C. destructor* died from *V. lecanii* and *Fusarium* spp. infections than *C. sinensis* on citrus in Northland, New Zealand (Lo and Chapman 1998).

### Chemical Control

Insecticides registered for soft scale management can be broadly categorized into contact and systemic insecticides. Systemic insecticides, which include members of organophosphates, neonicotinoids, tetramic acid derivatives, and diamides, function as contact insecticides when applied as topical sprays directly on the scale insects. When applied as soil drench, soil injection, basal trunk spray, trunk injection, granular broadcast, and pellet broadcast, systemic insecticides are absorbed by plant tissues and translocated to the canopy. Their application flexibility and efficacy make systemic insecticides the preferred management tool against scale insect pests on large trees, in sensitive areas and in the urban landscape.



Systemic insecticides have longer residual efficacy than contact insecticides. Some ornamental plant growers and landscape care professionals use systemic insecticides to prevent infestation and damage by certain recurring pests, such as soft scales (Chong, personal observations). Systemic insecticides provide sufficient population suppression of certain scale insect species with only one application per year (Frank 2012; Chong, unpublished data). Typically, the application is made just before crawler emergence to ensure the highest concentration of active ingredients in the plant tissues. Although systemic insecticides have the benefits of greater flexibility and residual longevity, recent studies suggest that neonicotinoids should be used carefully because of their potential impact on pollinator health (Cowles 2014, Pisa et al. 2014, Johnson and Corn 2015) and their implication in spider mite outbreaks (Raupp et al. 2004, Szczepanec and Raupp 2012a, 2012b; Szczepanec et al. 2011, 2013).

Contact insecticides registered for soft scale management in the United States include carbamates, organophosphates, pyrethroids, neonicotinoids, juvenile hormone mimics, fenoxycarb, pyriproxyfen, flonicamid, buprofezin, tolfenpyrad, spirotetramat, diamides, azadirachtin, horticultural oils, and insecticidal soaps. A layer of wax, which is impenetrable to aqueous insecticide solution, covers the body of older nymphs and adults. Targeting crawlers and settled first instars, which lack or have only a thin protective wax layer, can achieve the greatest efficacy (Kosztarab 1996, Marotta 1997, Kabashima and Dreistadt 2014). Repeated applications (sometimes biweekly depending on insecticide residual longevity) may be needed because crawlers emerge over several weeks or months. IPM practitioners can use short residual or compatible insecticides (such as horticultural oil and insect growth regulators) to minimize impact on pollinators, natural enemies, and other nontarget organisms (Kosztarab and Kozár 1988, Kabashima and Dreistadt 2014).

Voltinism affects the frequency of contact insecticide application. When timed and applied properly, insecticides can reduce the population of univoltine species within one season (Chong, unpublished data). Suppressing the population of a multivoltine species may require multiple applications targeting crawlers of different generations (Bethke 2010, Chong, unpublished data).

### Acknowledgments

We thank four anonymous reviewers for their constructive comments. This project was supported by United States Department of Agriculture, National Institute of Food and Agriculture (USDA-NIFA) under project number SC-1700473 and grant number 2010-34103-21144. This is Technical Contribution No. 6286 of the Clemson University Experiment Station.

### References Cited

- Abd-Elhalim Moharum, F. 2011.** Ecological studies on the citrus wax scale insect, *Ceroplastes floridensis* Comstock (Hemiptera: Coccidae) on banana plants. *Ann. Agric. Sci. Moshthohor* 49: 469–472.
- Abd-Rabou, S., N. Ali, and M. M. El-Fatih. 2009.** Life table of the hemispherical scale, *Saissetia coffeae* (Walker) (Hemiptera: Coccidae). *Egypt. Acad. J. Biol. Sci.* 2: 165–170.
- Abd-Rabou, S., N. Aly, and H. Badary. 2012.** Biological studies of the cottony camellia scale, *Pulvinaria floccifera* (Hemiptera: Coccidae) with updating lists of host plants and natural enemies in Egypt. *Egypt. Acad. J. Biol. Sci.* 5: 107–112.
- Alford, D. V. 2007.** Pests of fruit crops: a color handbook. Plant Protection Handbook Series. Academic Press, Elsevier, Burlington, MA.
- Amarasekare, K. G., and C. M. Mannion. 2011.** Life history of an exotic soft scale insect *Phalacrocooccus howertoni* (Hemiptera: Coccidae) found in Florida. *Fla. Entomol.* 94: 588–593.
- Angel, R. A., and S. G. Radwan. 2013.** On the scale insects infesting mango trees and their parasitoids at Qalubia governorate, Egypt. *Egypt. J. Biol. Pest Control* 23: 131–135.
- Anneck, D. P. 1966.** Biological studies on the immature stages of soft brown scale, *Coccus hesperidum* Linnaeus (Homoptera: Coccidae). *South Afr. J. Agric. Sci.* 9: 205–227.
- (AQSIQ) General Administration of Quality Supervision, Inspection and Quarantine of the People's Republic of China. 2007.** Reply on supplementary information on pests in table grapes exported from China to Australia received on 19 March 2007. In *Biosecurity Australia* (2011), China's Commercial Production Practices for Table Grapes 15. Department of Agriculture, Fisheries and Forestry, Canberra, Australia.
- Argyriou, L. C. 1963.** Studies on the morphology and biology of the black scale [*Saissetia oleae* (Bernard)] in Greece. *Annales de l'Institut Phytopathologique Benaki* 5: 353–377.
- Argyriou, L. C., and A. G. Ioannides. 1975.** *Coccus aegaeus* (Homoptera, Coccoidea, Coccidae) De Lotto: Nouvelle espèce de lecanine des citrus en Grèce. *Fruits* 30: 161–162.
- Argyriou, L. C., and S. S. Paloukis. 1976.** Some data on biology and parasitization of *Sphaerolecanium prunastri* Fonscolombe (Homoptera Coccidae) in Greece. *Annales de l'Institut Phytopathologique Benaki* 11: 230–240.
- Argyriou, L. C., and A. L. Kourmadis. 1980.** *Ceroplastes floridensis* Comstock an important pest of citrus trees in Aegean islands. *Fruits* 35: 705–708.
- Argyriou, L. C., and A. P. Santorini. 1980.** On the phenology of *Ceroplastes rusci* L. (Hom.: Coccidae) on fig-trees in Greece. *Mededelingen van de Faculteit Landbouwwetenschappen Rijksuniversiteit Gent.* 45: 593–601.
- Asquith, D. 1949.** Two generations of European fruit lecanium in southern Pennsylvania. *J. Econ. Entomol.* 42: 853.
- Avidov, Z., and A. Zaitzov. 1960.** On the biology of the mango shield scale *Coccus mangiferae* (Green) in Israel. *Ktavim* 10: 125–137.
- Avidov, Z., and I. Harpaz. 1969.** Plant pests of Israel. Israel Universities Press, Jerusalem, Israel.
- Babayan, G. A. 1973.** The soft scale *Didesmococcus unifasciatus* (Arch.) (Homoptera, Coccoidea) in Armenia and the characteristics of its morphology. *Entomol. Rev.* 52: 97–101.
- Babayan, G. A. 1976.** Morphological and biological characteristics of *Eulecanium tiliae* L. (Homoptera, Coccoidea, Coccidae) in Armenia. *Entomol. Rev.* 55: 34–38.
- Babayan, G. A. 1986.** Scale insects of stone fruit crops and control measures against them. *Bolletino del Laboratorio di Entomologia Agraria Filippo Silvestri* 43: 133–138.
- Bach, C. E. 1991.** Direct and indirect interactions between ants (*Pheidole megacephala*), scales (*Coccus viridis*) and plants (*Pluchea indica*). *Oecologia* 87: 223–239.
- Baker R.F.A., S. F. Mousa, L. S. Hamouda, R. M. Badawy, and S. A. Atteia. 2012.** Scale insects infesting guava trees and control measure of *Pulvinaria psidii* (Hemiptera: Coccidae) by using the alternative insecticides. *Egypt. Acad. J. Biol. Sci.* 5: 89–106.
- Bakr, R. F., R. M. Badawy, S. H. Laila, E. Helmy, and S. A. Attia. 2010.** Taxonomic and ecological studies on the new record, *Ceroplastes cirripediformis* Comstock, 1881, (Coccidae: Homoptera) at Qaliobiya governorate. *Egypt. Acad. J. Biol. Sci.* 3: 119–132.
- Barbagallo, S. 1974.** Notizie sulla presenza in Sicilia di una nuova cocciniglia degli agrumi: *Coccus pseudomagnoliarum* (Kuwana) (Homoptera, Coccidae). *Osservazioni Biologiche Preliminari. Entomologica* 10: 121–139.
- Bartlett, B. R. 1961.** The influence of ants upon parasites, predators, and scale insects. *Ann. Entomol. Soc. Am.* 54: 543–545.
- Bartlett, B. R. 1978.** Coccidae, pp. 57–74. In C. P. Clausen (ed.), *Introduced parasites and predators of arthropod pests and weeds: A world review.* Agriculture Handbook, United States Department of Agriculture, Agricultural Research Service, Washington, DC.
- Bayer CropScience Chile. 2014.** Problemas: Conchuelas. Bayer S.A., Santiago, Chile. (<http://www.bayercropscience.cl/soluciones/problemas.asp>)
- Beattie, G.A.C., and J. C. Kaldor. 1990.** Comparison of high-volume oscillating boom and low-volume fan-assisted rotary atomiser sprayers for the control of Chinese wax scale, *Ceroplastes sinensis* del Guercio (Hemiptera: Coccidae), on Valencia orange, *Citrus sinensis* (L.) Osbeck. *Gen. Appl. Entomol.* 22: 49–53.
- Beattie, G.A.C., A. D. Clift, W. J. Allender, L. Jiang, and Y. A. Wang. 1991.** Efficacies of low- to high-volume (960–10 700 litre ha<sup>-1</sup>) citrus sprayers for applying petroleum spray oil to control Chinese wax scale. *Pestic. Sci.* 32: 47–56.
- Beingolea, G. O. 1969.** Notas sobre la biología de *Saissetia oleae* Bern. (Hom.: Coccidae) “quesera negra del olivo” en laboratorio y en el campo. *Revista Peruana de Entomología* 12: 130–136.
- Benassy, C., and E. Franco. 1974.** On the ecology of *Ceroplastes rusci* L. (Homoptera, Lecanoidae) in the Alpes-Maritimes. *Ann. Zool. Ecol. Anim.* 6: 11–39.
- Ben-Dov, Y. 1968.** Occurrence of *Sphaerolecanium prunastri* (Fonscolombe) in Israel and description of its hitherto unknown third larval instar. *Annales des Epiphyties* 19: 615–621.

- Ben-Dov, Y. 1978.** Taxonomy of the nigra scale *Parasaissetia nigra* (Nietner) (Homoptera: Coccoidea: Coccidae), with observations on mass rearing and parasites of an Israeli strain. *Phytoparasitica* 6: 115–127.
- Ben-Dov, Y. 1980.** Observations on scale insects (Homoptera: Coccoidea) of the Middle East. *Bull. Entomol. Res.* 70: 261–271.
- Ben-Dov, Y. 1993.** A systematic catalogue of the soft scale insects of the world (Homoptera: Coccoidea: Coccidae) with data on geographical distribution, host plants, biology and economic importance. Sandhill Crane Press, Inc., Gainesville, FL.
- Ben-Dov, Y., and C. J. Hogson. 1997.** Soft scale insects: their biology, natural enemies and control. Elsevier Science B.V., Amsterdam, The Netherlands.
- Ben-Dov, Y., D. R. Miller, and M. E. Gimpel. 2015.** ScaleNet. (<http://www.sel.barc.usda.gov/scalenet/scalenet.htm>). Last accessed 17 August 2015.
- Bentley, W. J., and K. R. Day. 2010.** UC IPM pest management guidelines: nectarine. UC ANR Publication 3451. Insects and Mites. (<http://www.ipm.ucdavis.edu/PMG/r540301511.html>). Last accessed 17 August 2015.
- Bernal, J. S., R. F. Luck, and J. G. Morse. 1998.** Sex ratios in field populations of two parasitoids (Hymenoptera: Chalcidoidea) of *Coccus hesperidum* L. (Homoptera: Coccidae). *Oecologia* 116: 510–518.
- Bernal, J. S., R. F. Luck, J. G. Morse, and M. S. Drury. 2001.** Seasonal and scale size relationships between citricola scale (Homoptera: Coccidae) and its parasitoid complex (Hymenoptera: Chalcidoidea) on San Joaquin Valley citrus. *Biol. Control* 20: 210–221.
- Bethke, J. A. 2010.** UC IPM pest management guidelines: Floriculture and ornamental nurseries. UC ANR Publication 3392. Insects and Mites. (<http://www.ipm.ucdavis.edu/PMG/r280301211.html>). Last accessed 14 February 2015.
- Bibolini, C. 1958.** Contributo alla conoscenza delle cocciniglie dell'olivo. *Saissetia oleae* (Homoptera Cocc.). *Frustula Entomol.* 1: 3–95.
- Biche, M., R., Belguendouz, N. Menzer, and A. Khouddour. 2012.** Biology of *Ceroplastes rusci* L. (Coccoidea: Lecanidae) on fig tree, *Ficus carica* L. in the area of Médéa (Algeria). *Agric. Biol. J. North Am.* 3: 208–212.
- Birjandi, A. K. 1981.** Biology and ecology of *Parthenolecanium* spp. (Hem., Coccidae). *Entomol. Monthly Mag.* 117: 47–58.
- Blumberg, D., and O. Blumberg. 1991.** The pyriform scale, *Protospulvinaria pyriformis*, and its common parasitoid, *Metaphycus stanleyi*, on avocado and *Hedera helix*. *Alon Hanotea* 45: 265–269.
- Blumberg, D., E. Swirski, and S. Greenberg. 1975.** Evidence for bivoltine populations of the Mediterranean black scale *Saissetia oleae* (Olivier) on citrus in Israel. *Israel J. Entomol.* 10: 19–24.
- Borchsenius, N. S. 1957.** Sucking insects, vol. IX. Suborder mealybugs and scale insects (Coccoidea). Family cushion and false scales (Coccidae). *Fauna of USSR. Akademii Nauk, USSR Zoological Institute* 66: 1–493.
- Briales, M. J., and M. Campos. 1986.** Estudio de la biología de *Saissetia oleae* (Olivier, 1791) (Hom.: Coccidae) en Granada (España). *Boletín de la Asociación Española de Entomología* 10: 249–256.
- Brink, T., and I. J. Bruwer. 1989.** Andersoni scale, *Cribrolecanium andersoni* (Newstead) (Hemiptera: Coccidae) a pest on citrus in South Africa. *Citrus J.* 645: 9–25.
- Buchanan, G. 2008.** Biological control of grapevine scales. Final report to the Australian Government, Grape and Wine Research and Development Corporation, Department of Primary Industries, State Government of Victoria, Biosciences Research Division, Victoria, Australia.
- Buckley, R., and P. Gullan. 1991.** More aggressive ant species (Hymenoptera: Formicidae) provide better protection for soft scales and mealybugs (Homoptera: Coccidae, Pseudococcidae). *Biotropica* 23: 282–286.
- Burns, D. P., and D. E. Donley. 1970.** Biology of the tuliptree scale, *Toumeyella lirioidendri* (Homoptera: Coccidae). *Ann. Entomol. Soc. Am.* 63: 228–235.
- Canard, M. 1958.** Recherches sur la morphologie et la biologie de la cochenille *Eulecanium corni* Bouche (Homopteres-Coccoidea). *Annales de l'Ecole Nationale Supérieure Agronomique de Toulouse* 6: 185–271.
- Carter, W. 1973.** Insects in relation to plant disease, 2nd ed. John Wiley and Sons, New York, NY.
- (CAST) Council for Agricultural Science and Technology. 2003.** Integrated pest management: current and future strategies. Council for Agricultural Science and Technology, Task Force Report No. 140, Ames, IA.
- Charles, J., L. Cole, D. Mundy, and J. Walker. 2005.** Soft scales in New Zealand vineyards. Research report commissioned by Winegrowers New Zealand Ltd., The Horticulture and Food Research Institute of New Zealand Ltd., Client Report No. 15419, Auckland, New Zealand.
- Chatterji, A., and A. R. Datta. 1974.** Bionomics and control of mango mealy scale *Chloropulvinaria (Pulvinaria) polygonata* (Cockerell) (Hemiptera: Coccidae). *Indian J. Agric. Sci.* 44: 791–795.
- Clarke, S. R. 2013.** Pine tortoise scale, pp. 1–7. United States Department of Agriculture, Forest Service, Forest Insect and Disease, Portland, OR.
- Clarke, S. R., G. L. DeBarr, and C. W. Berisford. 1989a.** Life history of the woolly pine scale *Pseudophilippia quaintancii* Cockerell (Homoptera: Coccidae) in loblolly pine seed orchards. *J. Entomol. Sci.* 24: 365–372.
- Clarke, S. R., G. L. DeBarr, and C. W. Berisford. 1989b.** The life history of *Toumeyella pini* (King) (Homoptera: Coccidae) in loblolly pine seed orchards in Georgia. *Can. Entomol.* 121: 853–860.
- Clausen, C. P. 1978.** Introduced parasites and predators of arthropod pests and weeds: A world review. United States Department of Agriculture, Agricultural Research Service, Agricultural Handbook No. 480. Division of Biological Control, University of California, Riverside, CA.
- Coll, M., and S. Abd-Rabou. 1998.** Effect of oil emulsion sprays on parasitoids of the black parlatoria, *Parlatoria ziziphi*, in grapefruit. *BioControl* 43: 29–37.
- Cooper, D. D., and W. Cranshaw. 2004.** Seasonal biology and associated natural enemies of two *Toumeyella* spp. in Colorado. *Southwest. Entomol.* 29: 39–45.
- Cottier, W., and N. Z. Wellington. 1939.** Citrus pests: (7) Scale insects. Unshielded scales. The cottony cushion scale and the white wax scale. *N. Z. J. Agric.* 58: 421–422.
- Cowles, R. S. 2014.** Systemic insecticide impacts on the environment and bee pollinators. (<http://expo2014.tcia.org/files/Neinicotinoids%20and%20Bee%20Health%2011-13-14.pdf>). Last accessed 14 February 2015.
- Cranshaw, W., D. Leatherman, and B. Kondratieff. 1994.** Insects that feed on colorado trees and shrubs. Bulletin 506A, Colorado State University Cooperative Extension, Fort Collins, CO.
- Danzig, E. M. 1959.** On the scale insect fauna (Homoptera, Coccoidea) of the Leningrad region. *Entomologischeskoe Obozrenie* 38: 443–455.
- Danzig, E. M. 1980.** Scale insects of the ar East USSR (Homoptera, Coccinea) with phylogenetic analysis of scale insects fauna of the world. *Nauka, Leningrad.*
- Danzig, E. M. 1986.** Coccids of the Far East USSR (Homoptera, Coccinea). phylogenetic analysis of coccids in the world fauna. Oxoniam Press, New Delhi, Calcutta, India.
- Danzig, E. M. 1997.** Intraspecific variation of taxonomic characters, pp. 203–212. *In* Y. Ben-Dov and C. J. Hodgson (eds.), *Soft scale insects: Their biology, natural enemies and control*, vol. 7A. Elsevier Science B.V., Amsterdam, The Netherlands.
- Davis, E. E., S. French, and R. C. Venette. 2005.** Mini risk assessment: Japanese Wax Scale: *Ceroplastes japonicus* Green. USDA-APHIS. St. Paul, MN. ([http://www.aphis.usda.gov/plant\\_health/plant\\_pest\\_info/pest\\_detection/downloads/prajaponicuspra.pdf](http://www.aphis.usda.gov/plant_health/plant_pest_info/pest_detection/downloads/prajaponicuspra.pdf)). Last accessed 14 February 2015.
- Day, E. 2008.** Scale insects. Virginia Polytechnic Institute and State University. Department of Entomology, Virginia Cooperative Extension. Blacksburg, VA. ([http://pubs.ext.vt.edu/2808/2808-1012/2808-1012\\_pdf.pdf](http://pubs.ext.vt.edu/2808/2808-1012/2808-1012_pdf.pdf)). Last accessed 17 August 2015.
- De Freitas, A. 1972.** A cochonilha-negra [*Saissetia oleae* (Oliv.)] em Oliveira. *Bioecologia e influência dos tratamentos antidáxicos.* *Agronomia Lusitana* 33: 349–390.
- De la Cruz Blanco, J. I., A. J. Guisado López, and M. C. Albero Portilla. 2010.** Cochinita de la higuera *Ceroplastes rusci*, Ficha No. 49. Fichas Técnicas de Sanidad Vegetal, Artrópodos Frutales 08, Dirección General de Explotaciones Agrarias y Calidad Alimentaria, Consejería de Agricultura y Desarrollo Rural, Junta de Extremadura, Extremadura, Spain.
- Del-Bene, G. 1991.** A contribution to the knowledge of *Parthenolecanium pom-eranicum* (Kaw.) new record, a coccidae new to Italy. *Redia* 74: 1–14.
- Deng, D. L. 1985.** *Anthrribus niveovarigatus* (Reolofs) a natural enemy of *Eulecanium excrescens* Ferris. *Plant Protection Zhiwu Baohu* 11: 14–15.
- Drees, B. M., J. A. Reinert, and M. L. Williams. 2005.** Florida wax scales: A major pest of hollies and other landscape shrubs and trees. Texas Cooperative Extension, the Texas A&M University System, Publication EEE-00023, College Station, TX.
- Dreistadt, S. H. 2004.** Scales, pp.130–147. *In* M. L. Flint (ed.), *Pests of landscape trees and shrubs: an integrated pest management guide.* University of California Integrated Pest Management Program, Division of Agriculture and Natural Resources, Publication 3359. Oakland, CA.
- Dreistadt, S. H. 2008.** Integrated pest management for avocados. Statewide Integrated Pest Management Program. University of California, Division of Agriculture and Natural Resources, Publication 3503. Oakland, CA.
- Ebeling, W. 1938.** Host-determined morphological variations in *Lecanium corni*. *Hilgardia* 11: 613–631.
- Ecevit, O., M. Isik, and A. F. Yanilmaz. 1987.** Bio-ecological researches on *Parthenolecanium corni* Bouche, *Parthenolecanium rufulum* Ckll. and *Lepidosaphes ulmi* L. which are harmful of hazelnut and chemical control studies on *Lepidosaphes ulmi* L. *Ondokuzmayis Universitesi Yayinlari* 19: 1–34.
- Essig, E. O. 1915.** Injurious and beneficial insects of California, 2nd ed. California State Commission of Horticulture. Supplement to the



- Monthly Bulletin, vol. IV, No. 4. California State Printing Office. Berkeley, CA.
- Essig, E. O. 1958.** Insects and mites of western North America. The MacMillan Co., New York, NY.
- Evans, H. C., and N. L. Hywel-Jones. 1997.** Entomopathogenic fungi, pp. 3–27. *In* Y. Ben-Dov and C. J. Hogson (eds.), *Soft scale insects: Their biology, natural enemies and control*, vol. 7B. Elsevier Science B.V., Amsterdam, The Netherlands.
- Fan, Y., L. Zhao, J.-L. Ren, L.-Y. Zhang, and X.-J. Jia. 2013.** Biological characteristics of *Rhodococcus turanicus* (Archangelskaja) (Hemiptera: Coccidae). *Huanjing Kunchong Xuebao* 35: 728–736.
- Fernandes, F. L., M. C. Picanco, M.E.S. Fernandes, R. B. Queiroz, V. M. Xavier, and H.E.P. Martinez. 2012.** The effects of nutrients and secondary compounds of *Coffea arabica* on the behavior and development of *Coccus viridis*. *Environ. Entomol.* 41: 333–341.
- Flanders, S. E. 1942.** Biological observations on the citricola scale and its parasites. *J. Econ. Entomol.* 35: 830–833.
- Frank, S. D. 2012.** Reduced risk insecticides to control scale insects and protect natural enemies in the production and maintenance of urban landscape plants. *Environ. Entomol.* 41: 377–386.
- Frediani, D. 1960.** Il *Ceroplastes sinensis* Del Guer. vivente su *Pirus communis* L. nella Toscana litoranea. *Appunti di Biologia. Annali della Facolta d'Agraria di Pisa* 21: 89–95.
- Fredrick, J. M. 1943.** Some preliminary investigations of the green scale, *Coccus viridis* (Green), in South Florida. *Fla. Entomol.* 26: 12–15.
- Fulcher, A., W. E. Klingeman, J. H. Chong, A. LeBude, G. R. Armel, M. Chappell, S. Frank, F. Hale, J. Neal, S. White, et al. 2012.** Stakeholder vision of future direction and strategies for Southeastern US nursery pest research and extension programming. *J. Integr. Pest Manag.* 3: 1–8.
- García, M. F. 1969.** Bioecología de la cochinilla negra del olivo *Saissetia oleae* Bernard y su control biológico. *Revista de Investigaciones Agropecuarias* 6: 69–81.
- Gilimee, J. H. 1997.** The adult male, pp. 23–30. *In* Y. Ben-Dov and C. J. Hogson (eds.), *Soft scale insects: Their biology, natural enemies and control*, vol. 7A. Elsevier Science B.V., Amsterdam, The Netherlands.
- Gill, R. J. 1988.** The Scale insects of California. Part 1. The soft scales (Homoptera: Coccoidea: Coccidae). Technical Services in Agricultural Biosystematics and Plant Pathology, California Department of Food and Agriculture, Sacramento, CA.
- Gill, R. J. 1997.** Citrus, pp. 207–216. *In* Y. Ben-Dov and C. J. Hogson (eds.), *Soft scale insects: Their biology, natural enemies and control*, vol. 7B. Elsevier Science B.V., Amsterdam, The Netherlands.
- Gill, R. J., and M. Kosztarab. 1997.** Economic importance, pp. 161–164. *In* Y. Ben-Dov and C. J. Hogson (eds.), *Soft scale insects: their biology, natural enemies and control*, vol. 7A. Elsevier Science B.V., Amsterdam, The Netherlands.
- Gonthier, D. J., G. M. Dominguez, J. D. Witter, A. L. Sponberg, and S. M. Philpott. 2013.** Bottom-up effects of soil quality on a coffee arthropod interaction web. *Ecosphere* 4:art107 (<http://dx.doi.org/10.1890/ES13-00072.1>)
- González, R. H., and L. Lamborot. 1989.** El género *Saissetia* Deplanche en Chile (Homoptera: Coccidae). *Acta Entomológica Chilena* 15: 237–242.
- Gounari, S., G. Goras, Ch. Tananaki, and A. Thrasvoulou. 2012.** The main honeydew producing insects in Greece (Hellas) (<http://ipb.pt/ihc2012/imagens/itf296.pdf>). Last accessed 14 February 2015.
- Grafton-Cardwell, E. E., B. J. Stewart, M. Brewer, and M. Trumble. 1999.** Citricola scale sampling and control. *Citrograph* 84: 4–7.
- Graora, D., R. Spasić, and L. Mihajlović. 2012.** Bionomy of spruce bud scale, *Physokermes piceae* (Schrank)(Hemiptera: Coccidae) in the Belgrade area, Serbia. *Arch. Biol. Sci.* 64: 337–343.
- Greathhead, D. J. 1997.** Crawler behavior and dispersal, pp. 339–342. *In* Y. Ben-Dov and C. J. Hogson (eds.), *Soft scale insects: Their biology, natural enemies and control*, vol. 7A. Elsevier Science B.V., Amsterdam, The Netherlands.
- Gressit, J. L., S. E. Flanders, and B. R. Bartlett. 1954.** Parasites of citricola scale in Japan, and their introduction into California. *Pan-Pac. Entomol.* 30: 5–9.
- Hadzibejli, Z. K. 1967.** Ecological characteristics of the genus *Eulecanium* Kll. in the fauna of Gruzia. *Trudy Instituta Zashchita Rastenii Gruzinskoy SSR* 19: 59–63.
- Hallaji-Sani, M. F., A. Rasekh, and B. Golain. 2012.** Biology and seasonal fluctuation of cottony camellia scale, *Pulvinaria (Chloropulvinaria) floccifera* (Hemiptera: Coccidae) in citrus orchards of northern Iran. *J. Entomol. Res.* 4: 289–296.
- Hamon, A. B., and M. L. Williams. 1984.** Arthropods of Florida and neighboring land areas, vol. 11: The soft scale insects of Florida (Homoptera: Coccoidea: Coccidae). Florida Department of Agriculture and Consumer Services, Division of Plant Industry, Gainesville, FL.
- Han, K. P., and E. S. Lee. 1964.** The studies on the bionomics of the Florida wax scale, *Ceroplastes floridensis* Comstock (Coccidae) on persimmon tree. *J. Plant Prot. Korea* 3: 31–39.
- Hanson, P. E., and J. C. Miller. 1984.** Scale insects on ornamental plants: A biological control perspective. *J. Arboricult.* 10: 259–264.
- Harman, S. W. 1927.** The peach cottony scale. *N.Y. State Agric. Exp. Stn. Bull.* 542: 1–19.
- Harris, K. M. 1997.** Cecidomyiidae and other Diptera, pp. 61–68. *In* Y. Ben-Dov and C. J. Hogson (eds.), *Soft scale insects: their biology, natural enemies and control*, vol. 7B. Elsevier Science B.V., Amsterdam, The Netherlands.
- Hassan, A. S., H. A. Nabil, A. A. Shahein, and K.A.A. Hammad. 2012.** Some ecological aspects of *Kilifia acuminata* (Hemiptera: Coccidae) and its parasitoids on mango trees at Sharkia Governorate, Egypt. *Egypt. Acad. J. Biol. Sci.* 5: 33–41.
- Hayat, M. 1997.** Aphelinidae, pp. 111–146. *In* Y. Ben-Dov and C. J. Hogson (eds.), *Soft scale insects: Their biology, natural enemies and control*, vol. 7B. Elsevier Science B.V., Amsterdam, The Netherlands.
- Helmy, E. I., S. M. El-Imery, and A. Habib. 1986.** Ecological studies on the Florida wax scale *Ceroplastes floridensis* Comstock (Homoptera: Coccidae) on citrus in Egypt. *Bulletin de la Societe Entomologique d'Egypte* 66: 155–166.
- Hermes, D. A. 2004.** Using degree-days and plant phenology to predict pest activity, pp. 49–59. *In* V. Krischick and J. Davidson (eds.), *IPM (Integrated Pest Management) of Midwest landscapes: Tactics and tools for IPM*. University of Minnesota, Minnesota Agriculture Experiment Station, Publication SB-07645, St. Paul, MN. (<http://www.entomology.umn.edu/cues/Web/049DegreeDays.pdf>)
- Hermes, D. A., and W. J. Mattson. 1992.** The dilemma of plants: to grow or to defend. *Q. Rev. Biol.* 67: 283–335.
- Herrick, G. W. 1931.** The magnolia scale (*Neolecanium cornuparvum* Thro.). *Ann. Entomol. Soc. Am.* 24: 302–306.
- Hodek, I., and A. Honek. 2009.** Scale insects, mealybugs, whiteflies and psyllids (Hemiptera, Sternorrhyncha) as prey of ladybirds. *Biol. Control* 51: 232–243.
- Hodges, G. S., and S. K. Braman. 2004.** Seasonal occurrence, phenological indicators and mortality factors affecting five scale insect species (Hemiptera: Diaspididae, Coccidae) in the urban landscape setting. *J. Entomol. Sci.* 39: 611–622.
- Hodges, G., J. M. Ruter, and S. K. Braman. 2001.** Susceptibility of *Ilex* species, hybrids and cultivars to Florida wax scale (*Ceroplastes floridensis* Comstock). *J. Environ. Hortic.* 19: 32–36.
- Hodgson, C. J. 1994.** The scale insect family Coccidae: An identification manual to genera. CAB International, Wallingford, England, United Kingdom.
- Hoelscher, C. L. 1967.** Wind dispersal of brown soft scale crawlers, *Coccus hesperidum* (Homoptera: Coccidae), and Texas citrus mites, *Eutetranychus banksi* (Acarina: Tetranychidae) form Texas citrus. *Ann. Entomol. Soc. Am.* 60: 673–678.
- Hollingsworth, C. S. 2014.** Grape-cottony maple scale *Pulvinaria vitis*. *In* *Pacific Northwest insect management handbook*. (<http://pnwhandbooks.org/insect/small-fruit/grape/grape-cottony-maple-scale>). Last accessed 14 February 2015.
- Hoover, G. A. 2006.** Fletcher scale *Parthenolecanium fletcheri* (Cockerell). Entomological notes. The Pennsylvania State University, University Park, PA. (<http://ento.psu.edu/extension/factsheets/pdf/fletcherScale.pdf>). Last accessed 14 February 2015.
- Hoover, G. A., G. W. Moorman, K. M. Richards, and S. I. Gripp. 2011.** Woody ornamental insect, mite, and disease management. The Pennsylvania State University, College of Agricultural Sciences, Publications Distribution Center, University Park, PA.
- Hubbard, J. L., and D. A. Potter. 2005.** Life history and natural enemy associations of calico scale (Homoptera: Coccidae) in Kentucky. *J. Econ. Entomol.* 98: 1202–1212.
- Husseiny, M. M., and H. F. Madsen. 1962.** The life history of *Lecanium kunoensis* Kuwana (Homoptera: Coccidae). *Hilgardia* 33: 179–203.
- Insera, S. 1970.** *Ceroplastes rusci* L. in the citrus groves of the province of Catania. *Bollettino del Laboratorio di Entomologia Agraria Filippo Silvestri, Portici* 28: 77–97.
- Ishaaya, I., and E. Swirski. 1976.** Trehalase, invertase, and amylase activities in the black scale, *Saissetia oleae*, and their relation to host adaptability. *J. Insect Physiol.* 22: 1025–1029.
- Itioka, T., and T. Inoue. 1991.** Settling-site selection and survival of two scale insects, *Ceroplastes rubens* and *C. ceriferus*, on citrus trees. *Res. Popul. Ecol.* 33: 69–85.



- Itioka, T., and T. Inoue. 1996a.** Density-dependent ant attendance and its effect on the parasitism of a honeydewproducing scale insect, *Ceroplastes rubens*. *Oecologia* 106: 448–454.
- Itioka T, and T. Inoue. 1996b.** The consequence of ant-attendance to the biological control of the red wax scale insect *Ceroplastes rubens* by *Anicetus beneficus*. *J. Appl. Ecol.* 33: 609–618.
- Jarraya, A. 1974.** Observations bioécologiques sur une cochenille citricole dans la région de Tunis, *Saissetia oleae* (Bernard) (Homoptera, Coccoidea, Coccidae). *Bulletin-Section Regionale Ouest Palaearticque, Organisation Internationale de Lutte Biologique* 3: 135–157.
- Johnson, W. T., and H. H. Lyon. 1991.** Insects that feed on trees and shrubs, 2nd ed. (revised). Cornell University Press, Ithaca, NY.
- Johnson, R., and M. L. Corn. 2015.** Bee health: The role of pesticides. United States Congress, Lybrary of Congress, Congressional Research Service Report 7-5700, R43900 (<http://fas.org/sgp/crs/misc/R43900.pdf>). Last accessed 18 August 2015.
- Kabashima, J. N., and S. H. Dreistadt. 2014.** Scales: integrated pest management for home gardeners and landscape professionals. University of California, Agriculture and Natural Resources, Statewide Integrated Management Program, Pest Notes, Publication 7408, Davis, CA.
- Kaiju, W.E.I. 2011.** Bionomics of *Ceroplastes floridensis* in *Cinnamomum japonicum*. *Forest Pest and Disease* 5: 004.
- Kapranas, A., and A. Tena. 2015.** Encyrtid parasitoids of soft scale insects: Biology, behavior, and their use in biological control. *Annu. Rev. Entomol.* 60: 195–211.
- Katsoyannos, P. 1996.** Integrated insect pest management for citrus in northern Mediterranean countries. Benaki Phytopatological Institute, Kiphissia, Athens, Greece, p. 110.
- Kattoulas, M. E., and C. S. Koehler. 1965.** Studies on the biology of the irregular pine scale. *J. Econ. Entomol.* 58: 727–730.
- Kawecki, Z. 1958.** Studies on the genus *Lecanium* Burm. Part IV. Materials to a monograph of the brown scale, *Lecanium corni* Bouche, Marchal (♀ nec ♂) (Homoptera: Coccoidea: Lecaniidae). *Annales Zoologici Warszawa* 17: 135–245.
- Kehr, A. E. 1972.** Research – what's new in '72. Presentation given at 1972 Annual Meeting, San Francisco. Plant Science Research Division, Agricultural Research Service, U. S. Department of Agriculture, Beltsville, MD.
- Kennett, C. E. 1988.** Results of exploration for parasitoids of citricola scale, *Coccus pseudomagnoliarum* (Homoptera: Coccidae), in Japan and their introduction to California. *Kontyu, Tokyo* 56: 445–457.
- Kennett, C. E., K. S. Hagen, and K. M. Daane. 1995.** Citricola scale, pp. 148–149. *In* J. R. Nechols, L. A. Andres, J. W. Beardsley, R. D. Goeden, and C. G. Jackson (eds.), *Biological control in the western United States: Accomplishments and benefits of regional research project W-84, 1964–1989*. University of California, Division of Agricultural and Natural Resources, Oakland, CA.
- Klingeman, B., P. Lambdin, and F. Hale. 2002.** Pests in the spotlight: Top tips for managing scales and mealybugs on ornamentals. *Tenn. Green Times Spring* 2012: 34–37.
- Kondo Rodríguez, D. T. 2009.** Brote poblacional de “la tortuguita”: *Ceroplastes cirripediformis* Comstock en un cultivo de maracuyá en Palmira, Valle del Cauca, Colombia. *Corporación Colombiana de Investigación Agropecuaria, Centro de Investigación Palmira, Novedades Técnicas* 10: 26–33.
- Kosztarab, M. 1959.** Biological notes on the scale insects of Hungary. *Ann. Entomol. Soc. Am.* 52: 401–420.
- Kosztarab, M. 1988.** Biological diversity: national biological survey, pp. 1–25. *In* D. H. Snyder (ed.), *Proceedings of the first annual Symposium on the Natural History of Lower Tennessee and Cumberland River Valleys, 11–12 March 1988, Brandon Springs Group Camp, Clarksville, TN*. The Center for Field Biology of Land Between the Lakes, Austin Peay State University, Clarksville, TN.
- Kosztarab, M. 1996.** Scale insects of northeastern North America: Identification, biology, and distribution. Virginia Museum of Natural History, Special Publication Number 3, Martinsville, VA.
- Kosztarab, M. 1997a.** Ornamentals and house plants, pp. 357–365. *In* Y. Ben-Dov and C. J. Hodgson (eds.), *Soft scale insects: Their biology, natural enemies and control*, vol. 7B. Elsevier Science B.V., Amsterdam, The Netherlands.
- Kosztarab, M. 1997b.** Coniferous forest trees, pp. 343–346. *In* Y. Ben-Dov and C. J. Hodgson (eds.), *Soft scale insects: Their biology, natural enemies and control*, vol. 7B. Elsevier Science B.V., Amsterdam, The Netherlands.
- Kosztarab, M., and F. Kozár. 1983.** Introduction of *Anthrribus nebulosus* (Coleoptera: Anthribidae) in Virginia for control of scale insects: A review. *Va. J. Sci.* 34: 223–236.
- Kosztarab, M., and F. Kozár. 1988.** Scale insects of central Europe. Budapest: Akadémiai Kiadó 41: 1–456.
- Kozár, F. 1972.** Susceptibility of peach varieties to infection by scale, with special regard to San José scale. *Acta Phytopathol. Acad. Sci. Hungaricae* 7: 409–414.
- Krischik, V., and J. Davidson. 2003.** IPM of Midwest landscapes: tactics and tools for IPM. University of Minnesota, Minnesota Agriculture Experiment Station, St. Paul, MN.
- Kulhanek, A. 2009.** User-friendly methods for timing integrated pest management strategies: An analysis of degree-day models and biological calendars. M.S. thesis, Ohio State University, Columbus, OH.
- Kunkel, H. 1997.** Factors affecting the built-up of scale insect populations, pp. 297–298. *In* Y. Ben-Dov and C. J. Hodgson (eds.), *Soft scale insects: Their biology, natural enemies and control*, vol. 7A. Elsevier Science B.V., Amsterdam, The Netherlands.
- Kuwana, S. I. 1923.** I. Descriptions and biology of new or little-known coccids from Japan. *Bull. Agric. Commer. Imp. Plant Quarantine Stn. Yokohama* 3: 1–67.
- Lai, C. B. 1993.** Study on the bionomics of *Ceroplastes ceriferus* Anderson in tea gardens and its control. *Entomol. Knowl.* 30: 337–338.
- Landis, D. A., S. D. Wratten, and G. M. Gurr. 2000.** Habitat management to conserve natural enemies of arthropod pests in agriculture. *Annu. Rev. Entomol.* 45: 175–201.
- LeBude, A. V., S. A. White, A. F. Fulcher, S. Frank, J.-H. Chong, M. R. Chappell, A. Windham, S. K. Braman, W. E. Klingeman III, K. Ivors, et al. 2012.** Assessing the integrated pest management practices of southeastern U.S. nursery operations. *Pest Manag. Sci* 68: 1278–1288. (doi:10.1002/ps.3295).
- Li, C.-Y., and T. H. Su. 2002.** Effects of temperature on development of the hemispherical scale, *Saissetia coffeae* (Walker) (Homoptera: Coccidae), and its occurrence on cycad (*Cycas taiwanian* Carr.). *Formosan Entomol.* 22: 65–74.
- Li, Z. X. 2004.** Control of pests and diseases of table grape. *In* *Biosecurity Australia* (2011), China's commercial production practices for table grapes 15. Department of Agriculture, Fisheries and Forestry, Canberra, Australia.
- Lloréns, J. M. 1990.** Homoptera 1 - Cochinillas de los cítricos y su control biológico, 3rd ed. PISA Ediciones, Valencia, Spain.
- Llorens-Climent, J. M. 1984.** Las Cochinillas de los Agrios. Conselleria de Agricultura, Pesca y Alimentación, Servicio de Protección de los Vegetales, Valencia, Spain.
- Lo, P. L., and R. B. Chapman. 1998.** The role of parasitoids and entomopathogenic fungi in mortality of third-instar and adult *Ceroplastes destructor* and *C. sinensis* (Hemiptera: Coccidae: Ceroplastinae) on citrus in New Zealand. *Biocontrol Sci. Technol.* 8: 573–582.
- Lo, P. L., R. H. Blank, and D. R. Penman. 1996.** Phenology and relative abundance of *Ceroplastes destructor* and *C. sinensis* (Hemiptera: Coccidae) on citrus in Northland, New Zealand. *N. Z. J. Crop Horticul. Sci.* 24: 315–321.
- Loch, A. D., and M. P. Zalucki. 1997.** Variation in length, fecundity and survival of pink wax scale, *Ceroplastes rubens* Maskell (Hemiptera: Coccidae), on umbrella trees. *Aust. J. Zool.* 45: 399–407.
- Longo, S., and D. Benfatto. 1982.** Note biologiche su *Coccus hesperidum* L. (Rhyncota, Coccidae) e risultati di prove di lotta. *Giornate Fitopatologiche* 3: 139–146.
- Longo, S., and A. Russo. 1986.** Distribution and density of scale insects (Homoptera, Coccoidea) on citrus-groves in Eastern Sicily and Calabria, pp. 41–50. *In* *Integrated pest control in citrus-groves, Proceedings of the Experts' Meeting, 26–29 March 1985, Acireale*. Commission of the European Communities. Rotterdam, The Netherlands.
- Madsen, H. F. 1962.** The life history of *Lecanium kunoense* Kuwana, Homoptera: Coccidae. *Hilgardia Berkeley* 33: 179–203.
- Madsen, H. F., and M. M. Barnes. 1959.** Pests of pear in California. *Calif. Agric. Exp. Stn. Circular* 478: 1–40.
- Malumphy, C. P. 1992.** A morphological and experimental investigation of the *Pulvinaria vitis* complex in Europe. Ph.D. thesis, Imperial College, University of London, United Kingdom.
- Malumphy, C. P. 1997.** Morphology and anatomy of honeydew eliminating organs, pp. 269–274. *In* Y. Ben-Dov and C. J. Hodgson (eds.), *Soft scale insects: their biology, natural enemies and control*, vol. 7A. Elsevier Science B.V., Amsterdam, The Netherlands.
- Malumphy, C., D. Eyre, and R. Cannon. 2011.** Plant pest factsheet: fletcher scale *Parthenolecanium fletcheri*. The Food and Environmental Research Agency, Crown Publishers, Sand Hutton, York, United Kingdom. (<http://www.fera.defra.gov.uk/plants/publications/documents/factsheets/fletcherScale2011.pdf>)

- Malumphy, C., M. A. Hamilton, B. N. Manco, P.W.C. Green, M. D. Sanchez, M. Corcoran, and E. Salamanca. 2012.** *Toumeyella parvicornis* (Hemiptera: Coccidae), causing severe decline of *Pinus caribaea* var. *Bahamensis* in the Turks and Caicos Islands. Fla. Entomol. 95: 113–119.
- Mansour, F., and W. H. Whitecomb. 1986.** The spiders of a citrus grove in Israel and their role as biocontrol agents of *Ceroplastes floridensis* (Homoptera: Coccidae). Entomophaga 31: 269–276.
- Marín-Loayza, R., and F. Cisneros-Vera. 1996.** Ocurrencia estacional y parasitismo de *Ceroplastes floridensis* y *C. cirripediformis* (Homoptera: Coccidae) en la costa peruana. Revista peruana de Entomología 39: 91–96.
- Marotta, S. 1997.** General life history, pp. 251–255. In Y. Ben-Dov and C. J. Hodgson (eds.), Soft scale insects: Their biology, natural enemies and control, vol. 7A. Elsevier Science B.V., Amsterdam, The Netherlands.
- Marotta, S., and A. Tranfaglia. 1997.** Seasonal history; Diapause, pp. 343–350. In Y. Ben-Dov and C. J. Hodgson (eds.), Soft scale insects: their biology, natural enemies and control, vol. 7A. Elsevier Science B.V., Amsterdam, The Netherlands.
- Martínez-Ferrer, M. T., J. M. Campos-Rivela, and M. J. Verdú. 2015.** Seasonal trends, sampling plans and parasitoid complex of the Chinese wax scale, *Ceroplastes sinensis* Del Guercio (Hemiptera; Coccidae), in Mediterranean citrus groves. Bull. Entomol. Res. 105: 70–81.
- Masten-Milek, T., G. Seljak, and M. Simala. 2007.** *Ceroplastes japonicus* (Green) (Hemiptera: Coccidae) a new pest in Croatia and its distribution, pp. 330–334. In Lectures and conferences at the 8th Slovenian Conference on Plant Protection, 6–7 March 2007, Radenci, Slovenia.
- McClure, 1977.** Resurgence of scale, *Fiorinia externa* (Homoptera: Diaspididae), on hemlock following insecticide application. Environ. Entomol. 6: 480–484.
- McClure, M. S. 1985.** Susceptibility of pure and hybrid stands of *Pinus* to attack by *Matsucoccus matsumurae* in Japan (Homoptera: Coccoidea: Margarodidae). Environ. Entomol. 14: 535–538.
- McKenzie, H. L. 1951.** Present status of the Kuno scale, *Lecanium kunoensis* Kuwana, in California. Calif. Dep. Agric. Monthly Bull. 40: 105–109.
- Meineke, E. K., R. R. Dunn, J. O. Sexton, and S. D. Frank. 2013.** Urban warming drives insect pest abundance on street trees. PLoS ONE 8: e59687. (doi:10.1371/journal.pone.0059687).
- Mendel, Z., H. Podoler, and D. Rosen. 1984.** Population dynamics of the Mediterranean black scale, *Saissetia oleae* (Olivier), on citrus in Israel. J. Entomol. Soc. Southern Afr. 47: 23–34.
- Meyer, J. R., C. A. Nalepa, and C. Devorshak. 2001.** A new species of *Anicetus* (Hymenoptera: Encyrtidae) parasitizing terrapin scale, *Mesolecanium nigrofasciatum* (Hemiptera: Coccidae). Fla. Entomol. 84: 686–690.
- Mibey, R. K. 1997.** Sooty moulds, pp. 275–290. In Y. Ben-Dov and C. J. Hodgson (eds.), Soft scale insects: their biology, natural enemies and control, vol. 7A. Elsevier Science B.V., Amsterdam, The Netherlands.
- Michelbacher, A. E. 1955.** Frosted scale on walnuts in northern California. Pan Pac. Entomol. 31: 139–148.
- Michelbacher, A. E., and J. C. Ortega. 1958.** Unarmored scales, pp. 46–55. In A technical study of insects and related pests attacking walnuts. California Agricultural Experimental Station Bulletin 764. University of California, Berkeley, CA.
- Michelbacher, A. E., and J. E. Swift. 1954.** Parasites of the frosted scale: tests in northern California show natural enemies of scale control pest when not depleted by sprays. Calif. Agric. 8: 9–10.
- Millar, J. G., S. P. Chinta, J. S. McElfresh, L. J. Robinson, and J. G. Morse. 2012.** Identification of the sex pheromone of the invasive scale *Acutaspis albopicta* (Hemiptera: Diaspididae), arriving in California on shipments of avocados from Mexico. J. Econ. Entomol. 105: 497–504.
- Miller, D. R. 1985.** Family Coccidae - soft scales, pp. 94–100. In Insects of eastern forests. United States Department of Agriculture, Forest Service, Miscellaneous Publication No. 1426, Washington, DC.
- Miller, G. L., and D. R. Miller. 2003.** Invasive soft scales (Hemiptera: Coccidae) and their threat to U. S. agriculture. Proc. Entomol. Soc. Wash. 105: 832–846.
- Miller, G. L., and M. L. Williams. 1990.** Tests of male soft scale insects (Homoptera: Coccidae) from America north of Mexico, including a key to the species. Syst. Entomol. 15: 339–358.
- Miller, G. L., J. D. Oswald, and D. R. Miller. 2004.** Lacewings and scale insects: A review of predator/prey associations between the neuropterida and coccoidea (Insecta: Neuroptera, Raphidioptera, Hemiptera). Ann. Entomol. Soc. Am. 97: 1103–1125.
- Miller, D. R., G. L. Miller, G. S. Hodges, and J. A. Davidson. 2005.** Introduced scale insects (Hemiptera: Coccoidea) of the United States and their impact on U.S. agriculture. Proc. Entomol. Soc. Wash. 107: 123–158.
- Milne, W. M. 1993.** The effect of watering regime on immature stages of *Ceroplastes destructor* Newstead (Hemiptera: Coccidae). J. Aust. Entomol. Soc. 32: 229–232.
- Mitter, C., and D. J. Futuyma. 1983.** An evolutionary genetic view of host-plant utilization by insects, pp. 413–495. In R.F. Denno and M. S. McClure (eds.), Variable plants and herbivores in natural and managed systems. Academic Press, New York, NY.
- Monastero, S. 1962.** Le cocciniglie degli agrumi in Sicilia. (*Mytilococcus beckii* New., *Parlatoria ziziphus* Lucas, *Coccus hesperidum* L., *Pseudococcus adonidum* L., *Coccus oleae* Bern., *Ceroplastes rusci* L.) II Nota. Bolletino Istituto di Entomologia Agraria di Palermo 4: 65–151.
- Moreno, D. S., G. E. Carman, R. E. Rice, J. G. Shaw, and N. S. Bain. 1972.** Demonstration of a sex pheromone of the yellow scale, *Aonidiella citrina*. Ann. Entomol. Soc. Am. 65: 443–446.
- Mori, N., G. Pellizzari, and L. Tosi. 2001.** First record of the wax scale *Ceroplastes ceriferus* (Fabricius) (Hemiptera, Coccoidea) in Italy. Informatore Fitopatologico 51: 41–43.
- Moznette, G. F. 1922.** The avocado: Its insect enemies and how to combat them. Farmers' Bull. 1261: 1–32.
- Murphy, S. T. 1997.** Coffee, pp. 367–380. In Y. Ben-Dov and C. J. Hodgson (eds.), Soft scale insects: Their biology, natural enemies and control, vol. 7B. Elsevier Science B.V., Amsterdam, The Netherlands.
- Mussey, G. J., and D. A. Potter. 1997.** Phenological correlations between flowering plants and activity of urban landscape pests in Kentucky. J. Econ. Entomol. 90: 1615–1627.
- Naeimamini, S., H. Abbasipour, and S. Aghajanzadeh. 2014.** Spatial distribution of the cottony camellia scale, *Pulvinaria floccidera* (Westwood) (Hemiptera: Coccidae), in the tea orchards. J. Plant Prot. Res. 54: 44–52.
- Narada R., and V. Lechuga. 1971.** Estudio ecológico de los insectos de *Senecio praecox* D. C. En el Pedregal de San Angel. Tesis de licenciatura. Facultad de ciencias UNAM. México DF, México.
- (NJDA) New Jersey Department of Agriculture. 2006.** Scale insect pests. Division of Plant Industry, Nursery Inspection Program, Horticultural Pests of Regulatory Concern Bulletin, vol. III. ([http://www.state.nj.us/agriculture/divisions/pi/pdf/HPRC\\_3.pdf](http://www.state.nj.us/agriculture/divisions/pi/pdf/HPRC_3.pdf))
- Newstead, R. 1903.** Monograph of the Coccidae of the British Isles, Vol 2. Ray Society, London, United Kingdom.
- Noguera, V., M. J. Verdú, A. Gómez-Cadenas, and J. A. Jacas. 2003.** Ciclo biológico, dinámica poblacional y enemigos naturales de *Saissetia oleae* Olivier (Homoptera: Coccidae), en olivares del Alto Palencia (Castellón). Boletín de Sanidad Vegetal, Plagas 29: 495–504.
- Nur, U. 1979.** Gonoid thelytoky in soft scale insects (Coccidae: Homoptera). Chromosoma 72: 89–104.
- Nur, U. 1980.** Evolution of unusual chromosome systems in scale insects (Coccidae: Homoptera), pp. 97–117. In R. L. Blackman and M. Ashburner (eds.), 10th Symposium, Insect Cytogenetics, Royal Entomological Society of London, 25–25 September 1979, London. Blackwell, Oxford, United Kingdom.
- Nuzzaci, G. 1969a.** Nota morfo-biologica sull'*Eulecanium corni* (Bouche) spp. *apuliae* nov. Entomologica 5: 9–36.
- Nuzzaci, G. 1969b.** Ossevizioni condotte in Puglia sulla *Saissetia oleae* Bern. (Homoptera-Coccidae) e i suoi simbionti. Entomologica 5: 127–138.
- Ohgushi, R. 1969.** Ecology of insect pests in citrus. Nosan-Gyoson Bunka Kyokai, Tokyo, Japan.
- Olson, H. M., R. H. Blank, and P. L. Lo. 1993.** The phenology of soft wax scale *Ceroplastes destructor* (Hemiptera: Coccidae) on tangelo in Kerikeri. N. Z. Entomol. 16: 25–29.
- Oncuer, C., and M. Tuncyurek. 1975.** Observations sur la biologie et les ennemis naturels de *Coccus pseudomagnoliarum* Kuw. dans les vergers d'agrumes de la region egeenne. Fruits 30: 255–257.
- Oswald, J. D. 2014.** Neuropterida Species of the World. Version 3.0. (<http://lacewing.tamu.edu/Species-Catalogue/>)
- Oguas, Y., and M. Chemseddine. 2011.** Effect of pruning and chemical control on *Saissetia oleae* (Olivier) (Hemiptera, Coccidae) in olives. Fruits 66: 225–234.
- Özgökçe, M. S., B. Yasar, and I. Karaca. 2001.** Life tables of *Lepidosaphes ulmi* (L.) and *Palaeolecanium bituberculatum* (Targioni Tozzetti) (Hemiptera: Coccoidea) on apple trees in Van Province, Turkey. Entomologica 33: 317–322.
- Ozsemerci, F., and T. Aksit. 2003.** Investigations on some biological characteristics and population fluctuation of *Ceroplastes rusci* L. (Homoptera: Coccidae) harmful to fig trees in Aydin province. Turkiye Entomoloji Dergisi 27: 13–25.
- Panis, A. 1977a.** Bioecología de la cochinita común de los agríos en la región mediterránea (Homoptera, Coccoidea, Coccidae). Boletín del Servicio de Defensa Contra Plagas e Inspección Fitopatológica 3:157–160.



- Panis, A. 1977b.** Contribución al conocimiento de la biología de la “cochinilla negra de los agrios” (*Saissetia oleae* Olivier). Boletín de Servicio de Plagas Forestales 3: 199–205.
- Paredes, D., L. Cayuela, G. M. Gurr, and M. Campos. 2015.** Is ground cover vegetation an effective biological control enhancement strategy against olive pests? PLoS ONE 10: e0117265. (doi:10.1371/journal.pone.0117265).
- Park, J. D., I. S. Park, and K. C. Kim. 1990.** Host range, occurrence and developmental characteristics of *Ceroplastes pseudoceriferus* (Homoptera: Coccidae) on persimmon trees. Korean J. Appl. Entomol. 29: 269–276.
- Patch, E. M. 1905.** The cottony grass scale *Eriopeltis festucae* (Fonsc.). Maine Agric. Exp. Stn. Bull. 121: 169–180.
- Peleg, B. A. 1965.** Observations on the life cycle of the black scale, *Saissetia oleae* Bern., on citrus and olive trees in Israel. Israel J. Agric. Res. 15: 21–26.
- Pellizzari, G. 1997.** Olive, pp. 217–229. In Y. Ben-Dov and C. J. Hodgson (eds.), Soft scale insects: Their biology, natural enemies and control, vol. 7B. Elsevier Science B.V., Amsterdam, The Netherlands.
- Pellizzari, G., and P. Camporese. 1994.** The *Ceroplastes* species (Homoptera: Coccidae) of the Mediterranean Basin with emphasis on *C. japonicus* Green. Annales de la Societe Entomologique de France 30: 175–192.
- Pellizzari, G., and F. Porcelli. 2014.** Alien scale insects (Hemiptera: Coccoidea) in European and Mediterranean countries: The fate of new and old introductions. Phytoparasitica 42: 713–721.
- Pellizzari, G., A. Rainato, and G. J. Stathas. 2010.** Description of the immature female instars of *Ceroplastes rusci* (Linnaeus) (Hemiptera: Coccidae). Zootaxa 2556: 40–50.
- Peng, Y. K., D. D. Cheng, C. C. Sheng, Y. L. Zhao, and B. C. Chai. 1990.** A study on *Chloropulvinaria polygonata* (Cockerell) in Sichuan (Coccoidea: Coccidae). Acta Entomol. Sin. 33: 323–329.
- Phillips, J.H.H. 1963.** Life history and ecology of *Pulvinaria vitis* (L.) (Hemiptera: Coccoidea), the cottony scale attacking peach in Ontario, Canada. Can. Entomol. 95: 372–407.
- Pisa, L. W., V. Amaral-Rogers, L. P. Belzunces, J. M. Bonmatin, C. A. Downs, D. Goulson, D. P. Kreutzweiser, C. Krupke, M. Liess, M. McField, et al. 2014.** Effects of neonicotinoids and fipronil on non-target invertebrates. Environ. Sci. Pollut. Res. 22: 68–102.
- Ponsonby, D. J., and M.J.W. Copland. 1997.** Coccinellidae and other Coleoptera, pp. 29–60. In Y. Ben-Dov and C. J. Hogson (eds.), Soft scale insects: Their biology, natural enemies and control, vol. 7B. Elsevier Science B.V., Amsterdam, The Netherlands.
- Potter, D. A., and C. T. Redmond. 2013.** Relative resistance or susceptibility of landscape-suitable elms (*Ulmus* spp.) to multiple insect pests. Arboricult. Urban For. 39: 236–243.
- Prabhaker, N., J. G. Morse, S. J. Castle, S. E. Naranjo, T. J. Henneberry, and N. C. Toscano. 2007.** Toxicity of seven foliar insecticides to four insect parasitoids attacking citrus and cotton pests. J. Econ. Entomol. 100: 1053–1061.
- Prinsloo, G. L. 1997.** Encyrtidae, pp. 69–110. In Y. Ben-Dov and C. J. Hogson (eds.), Soft scale insects: Their biology, natural enemies and control, vol. 7B. Elsevier Science B.V., Amsterdam, The Netherlands.
- Pucci, C., D. Salmistraro, A. Forcina, and G. Montanari. 1982.** Incidence of abiotic factors on the mortality of *Saissetia oleae* (Oliv.). Redia 65: 355–366.
- (QDAFF) Queensland Government Department of Agriculture, Fisheries and Forestry. 2014.** Pink wax scale. Queensland, Australia (<http://www.daff.qld.gov.au/plants/fruit-and-vegetables/a-z-list-of-horticultural-insect-pests/pink-wax-scale>).
- Qin, T. K. 1997.** The pela wax scale and commercial wax production, pp. 303–321. In Y. Ben-Dov and C. J. Hodgson (eds.), Soft Scale Insects: Their Biology, Natural Enemies and Control, vol. 7B. Elsevier Science B.V., Amsterdam, The Netherlands.
- Qin, T. K., and P. J. Gullan. 1994.** Taxonomy of the wax scales (Hemiptera: Coccidae: Ceroplastinae) in Australia. Invertebr. Syst. 8: 923–959.
- Quayle, H. J. 1916.** Dispersion of scale insects by the wind. J. Econ. Entomol. 9: 486–493.
- Rabkin, F. B., and R. R. Le Jeune. 1954.** Some aspects of the biology and dispersal of the pine tortoise scale (*Toumeyella numismaticum* Pettit & McDaniel) (Homoptera: Coccidae). Can. Entomol. 86: 570–575.
- Ragab, M. E. 1995.** Efficiency of *Scutellista cyanea* Motsch. (Hym., Pteromalidae) and *Tetrastichus ceroplastae* (Gir.) (Hym., Eulophidae) in population suppression of *Ceroplastes rusci* L. (Hom., Coccidae). J. Appl. Entomol. 119: 627–630.
- Rainato, A., and G. Pellizzari. 2009.** Observations on the biology of *Parthenolecanium rufulum* in northeastern Italy, with a redescription of the first and second instar females. Bull. Insectol. 62: 85–91.
- Rakimov, A., A. A. Hoffmann, and M. B. Malipatil. 2015.** Natural enemies of soft scale insects (Hemiptera: Coccoidea: Coccidae) in Australian vineyards. Aust. J. Grape Wine Res. 21: 302–310.
- Raupp, M. J., J. J. Holmes, C. Sadof, P. Shrewsbury, and J. A. Davidson. 2001.** Effects of cover sprays and residual pesticides on scale insects and natural enemies in urban forests. J. Arboricult. 27: 203–214.
- Raupp, M. J., R. Webb, A. Szczepanic, D. Booth, and R. Ahern. 2004.** Incidence, abundance, and efficacy of mites on hemlocks following applications of imidacloprid. J. Arboricult. 30: 108–113.
- Rebek, E. J., and C. S. Sadof. 2003.** Effects of pesticide applications on the euonymus scale (Homoptera: Diaspididae) and its parasitoid, *Encarsia citrine* (Hymenoptera: Aphelinidae). J. Econ. Entomol. 96: 446–452.
- Reed, D. K., W. G. Hart, and S. J. Ingle. 1970.** Influence of windbreaks on distribution and abundance of brown soft scale on citrus grooves. Ann. Entomol. Soc. Am. 63: 792–794.
- Rice, R. E., and D. S. Moreno. 1970.** Flight of male California red scale. Ann. Entomol. Soc. Am. 63: 91–96.
- Richards, W. R. 1958.** Identity of species of *Lecanium* Burmeister in Canada (Homoptera: Coccoidea). Canad. Entomol. 90: 305–315.
- Rosado, F., L. Bacci, J. C. Martins, G. A. Silva, L. M. Gontijo, and M. C. Picanço. 2014.** Natural biological control of green scale (Hemiptera: Coccidae): a field life-table study. Biocontrol Sci. Technol. 24: 190–202.
- Rosen, D., I. Harpaz, and M. Samish. 1971.** Two species of *Saissetia* (Homoptera: Coccidae) injurious to olive in Israel and their natural enemies. Israel J. Entomol. 6: 35–53.
- Ruberson, J. R., H. Nemoto, and Y. Hirose. 1998.** Pesticides and conservation of natural enemies, pp. 207–220. In P. Barbosa (ed.), Conservation biological control. Academic Press, San Diego, CA.
- Saakyan-Baranova, A. A. 1964.** On the biology of the soft scale *Coccus hesperidum* L. (Homoptera: Coccoidea). Entomol. Rev. 43: 135–147.
- Saakyan-Baranova, A. A., E. S. Sugonyayev, and G. G. Sheldeshova. 1971.** Brown fruit scale (*Parthenolecanium corni* Bouché) and its parasites (Chalcidoidea). The essay of the complex investigation of host-parasite relations. Nauka Publishers, Leningrad, USSR.
- Salem, S. A., and M. K. Hamdy. 1985.** On the population dynamics of *Ceroplastes floridensis* Comstock on guava trees in Egypt. Bulletin de la Societe Entomologique d’Egypte 65: 227–237.
- Salem, S. A., and F. N. Zaki. 1985.** Economic threshold level of the citrus scale, *Ceroplastes floridensis* Comst. on citrus in Egypt. Bulletin de la Societe Entomologique d’Egypte 65: 333–344.
- Santas, L. A. 1985.** *Parthenolecanium corni* (Bouche) an orchard scale pest producing honeydew foraged by bees in Greece. Entomol. Hellenica 3: 53–58.
- Schmutterer, H. 1952.** Die Ökologie der Cocciden (Homoptera, Coccoidea) Frankens. Zeitschrift für Angewandte Entomologie 33: 369–420, 544–584; 34: 65–100.
- Schmutterer, H. 1956.** Zur Morphologie, Systematik und Bionomie der *Physokermes* - Arten an Fichte (Homopt. Cocc.). Zeitschrift für Angewandte Entomologie 39: 445–466.
- Schultz, P. B. 1984.** Natural enemies of oak lecanium (Homoptera: Coccidae) in eastern Virginia. Environ. Entomol. 13: 1515–1518.
- Schweizer, H., J. G. Morse, R. F. Luck, and L. D. Forster. 2002.** Augmentative releases of a parasitoid (*Metaphycus* sp. nr. *flavus*) against citricola scale (*Coccus pseudomagnoliarum*) on oranges in the San Joaquin Valley of California. Biol. Control 24: 153–166.
- Sclar, D. C., and W. S. Cranshaw. 1996.** Evaluation of new systemic insecticides for elm insect pest control. J. Environ. Horticult. 14: 22–26.
- Shetlar, D. J. 2002.** Lecanium scales in Ohio landscapes. The Ohio State University, Ornamental Tree/Shrub Fact Sheet, Columbus, OH. (<http://bugs.osu.edu/bugdoc/Shetlar/factsheet/ornamental/Lecaniumscales.PDF>)
- Silvestri, F. 1939.** Compendio di Entomologia Applicata: Agraria, Forestale, Medica, Veterinaria. Partie speciale. Stabilimento Tipografico Bellavista, Portici, Italy.
- Simanton, F. L. 1916.** The terrapin scale: an important insect enemy of peach orchards. Unites States Department of Agriculture, Bulletin No. 351, Washington, DC.
- Simmonds, H. W. 1951.** Observations on the biology and natural control of the black scale of citrus, *Saissetia oleae* (Bern.), in South Australia. J. Dep. Agric. South Aust. 54: 339–342.
- Smirnov, W. A., and J. Valero. 1975.** Effects of fertilization by urea nitrogen or potassium on *Pinus banksiana* L. and the behavior of destructive insects such as *Neodiprion swaini* (Hymenoptera, Tenthredinidae) and *Toumeyella numismaticum* (Homoptera, Coccidae). Can. J. For. Res. 5: 236–244.
- Smith, D. 1970.** White wax scale and its control. Qld. Agric. J. 96: 704–708.
- Smith, D. 1986.** Biological control of *Ceroplastes rubens* Maskell, by the introduced parasitoid *Anicetus beneficus* Ishii and Yasumatsu. Qld. J. Agric. Anim. Sci. 43: 101–105.
- Smith, D., G. A. C. Beattie, and R. H. Broadley. 1997.** Citrus pests and their natural enemies: integrated pest management in Australia. State of



- Queensland, Department of Primary Industries, and Horticultural Research and Development Corporation, Brisbane, Australia.
- Smith, F. F., A. K. Ota, C. W. McComb, and J. A. Weidhaas, Jr. 1971.** Development and control of a wax scale, *Ceroplastes ceriferus*. J. Econ. Entomol. 64: 889–893.
- Smith, R. H. 1944.** Bionomics and control of the nigra scale, *Saissetia nigra*. Hilgardia 16: 225–288.
- Smith, S. F., and V. A. Krischik. 2000.** Effects of biorational pesticides on four coccinellid species (Coleoptera: Coccinellidae) having potential as biological control agents in interiorscapes. J. Econ. Entomol. 93: 732–736.
- Snowball, G. J. 1969.** Prospects for biological control of white wax scale (*Gascardia destructor*) in Australia by South African natural enemies. J. Aust. Entomol. Soc. 5: 23–33.
- Snowball, G. J. 1970.** *Ceroplastes sinensis* Del Guercio (Homoptera: Coccidae), a wax scale new to Australia. J. Aust. Entomol. Soc. 9: 57–64.
- Soria, S., P. Del Estal, and E. Viñuela. 1996.** Los Cócidos del Tejo (*Taxus baccata* L.) en España. Boletín de Sanidad Vegetal de Plagas 22: 241–249.
- Speight, M. R. 1991.** The impact of leaf feeding nymphs of the horse chestnut scale *Pulvinaria Regalis* Canard (Hem., Coccidae), on young host trees. J. Appl. Entomol. 69: 551–553.
- Stathas, G. J. 2001.** The scale *Nemolecanium graniformis* (Wunn) (Homoptera: Coccidae) in Greece. Anzeiger für Schadlingskunde - J. Pest Sci. 74: 57–59.
- Stathas, G. J., and F. Kozár. 2010.** First record of *Physokermes inopinatus* Danzig & Kozár 1973 (Hemiptera: Coccidae) in Greece. Hellenic Plant Prot. J. 3: 7–8.
- Stathas, G. J., N. G. Kavallieratos, and P. A. Eliopoulos. 2003a.** Biological and ecological aspects of Chinese wax scale, *Ceroplastes sinensis* Del Guercio (Hemiptera: Coccidae): A two-year study from Central Greece. Aust. J. Entomol. 42: 271–275.
- Stathas, G. J., P. A. Eliopoulos, S. L. Bouras, L. P. Economou, and D. C. Kontodimas. 2003b.** The scale *Parthenolecanium persicae* (Fabricius) on grapes in Greece. Integrated Protection and Production in Viticulture. IOBC-WPRS Bull. 26: 253–257.
- Stauffer, S., and M. Rose. 1997.** Biological control of soft scale insects in interior plantscapes in the USA, pp. 183–205. In Y. Ben-Dov and C. J. Hogson (eds.), Soft scale insects: their biology, natural enemies and control, vol. 7B. Elsevier Science B.V., Amsterdam, The Netherlands.
- Stimmel, J. F. 1978.** Fletcher scale, *Lecanium fletcheri* Cockerell. Homoptera: Coccidae. Pa. Dept. Agric. Regional Hort. Entomol. Circular 27: 15–16.
- Stimmel, J. F. 1996.** Spruce bud scale, *Physokermes hemicryphus* (Dalman) (Homoptera: Coccidae). Pa. Dept. Agric. Regulatory Hort. 22: 9–11.
- Stocks, I. 2013.** Recent adventive scale insects (Hemiptera: Coccoidea) and whiteflies (Hemiptera: Aleyrodidae) in Florida and the Caribbean Region, pp. 342–362. In J. E. Peña (ed.), Potential invasive pests of agricultural crops. CAB International, London, United Kingdom.
- Swiecki, T. J., and E. A. Bernhardt. 2006.** A field guide to insects and diseases of California oaks. General Technical Report PSW-GTR-197. United States Department of Agriculture, Forest service, Pacific Southwest Research Station, Albany, CA.
- Swirski, E., and S. Greenberg. 1972.** Phenology and control of the Florida wax scale (*Ceroplastes floridensis*) in the citrus orchards of Bet Dagan. Studies in the years 1969–1971. Alon haNotea 26: 269–283.
- Szczepaniec, A., and M. J. Raupp. 2012a.** Direct and indirect effects of imidacloprid on fecundity and abundance of *Eurytetranychus buxi* (Acari: Tetranychidae) on boxwoods. Exp. Appl. Acarol. 59: 307–318.
- Szczepaniec, A., and M. J. Raupp. 2012b.** Effects of imidacloprid on spider mite (Acari: Tetranychidae) abundance and associated injury to boxwood (*Buxus* spp.). Arboricult. Urban For. 38: 37–40.
- Szczepaniec, A., S. F. Creary, K. L. Laskowski, J.P. Nyrop, and M. J. Raupp. 2011.** Neonicotinoid insecticide imidacloprid causes outbreaks of spider mites on elm trees in urban landscapes PLoS ONE 6: e20018. (10.1371/journal.pone.0020018)PloS. ONE
- Szczepaniec, A., M. J. Raupp, R. D. Parker, D. Kerns, and M. D. Eubanks. 2013.** Neonicotinoid insecticides alter induced defenses and increase susceptibility to spider mites in distantly related crop plants PLoS ONE 8: e62620. (10.1371/journal.pone.0062620)PloS. ONE
- Takagi, M. 2003.** Biological control of citrus scale pests in Japan, pp 351–355. In Proceedings of the First International Symposium on Biological Control of Arthropods, 14–18 January 2002, Honolulu, Hawaii. USDA Forest Service, Forest Health Technology Enterprise Team (FHTET)-03-05, June 2003, Washington, DC.
- Takahashi, R. 1939.** Life history and control methods of *Pulvinaria polygonata*. Formos. Agric. Rev. 35: 403–414.
- Takahashi, R. 1955.** *Lepidosaphes* of Japan. (Diaspididae, Coccoidea, Homoptera). Bull. Osaka Prefecture 5: 67–78.
- Tao, M., G. H. Chen, B. L. Yang and J. H. Huang. 2003.** Studies on life history of *Ceroplastes rubens* Maskell and its natural enemies in Kunming. Southwest China J. Agric. Sci. 16: 38–41.
- Tassan, R. L., and K. S. Hagen. 1995.** Iceplant scales, pp. 150–154. In J. R. Nechols (ed.), Biological control in the western United States: accomplishments and benefits of regional research project W-84, 1964–1989. University of California, Division of Agriculture and Natural Resources, publication 3361, Oakland, CA.
- Tena A., A. Soto, R. Vercher, and F. Garcia-Mari. 2007.** Density and structure of *Saissetia oleae* (Hemiptera: Coccidae) populations on citrus and olives: relative importance of the two annual generations. Environ. Entomol. 36: 700–706.
- Tena, A. and F. Garcia-Mari. 2008.** Suitability of citricola scale *Coccus pseudomagnoliarum* (Hemiptera: Coccidae) as host of *Metaphycus helvolus* (Hymenoptera: Encyrtidae): Influence of host size and encapsulation. Biol. Control 46: 341–347.
- Teran, A. L. and N. H. Guyot. 1969.** La cochinilla del delta, *Lecanium deltae* (Lizer) (Hom., Coccoidea), en Tucumán. Acta Zoologica Lilloana 24: 135–149.
- Tereznikowa, E. M. 1981.** Scale insects: *Eriococcidae*, *Kermesidae* and *Coccidae*. Fauna Ukraini. Academiya Nauk Ukrainskoi RSR. Institut Zoologii. Kiev 20: 1–215.
- Thiem, H. 1933a.** Beitrag zur parthenogenese und Phanologie der Geschlechter von *Eulecanium corni* Bouchk (Coccidae). Zeitschrift fuer Morphologie und Oekologie der Tiere 27: 294–324.
- Thiem, H. 1933b.** Sexual biologische studien an der zwetschen schidlause (*Eulecanium corni*). Forschungen und Fortschritte 9: 492–493.
- Thomsen, M. 1929.** Sex determination in *Lecanium*, pp. 18–24. In K. Jordan and W. Horn (eds.), Proceedings of the 4<sup>th</sup> International Congress of Entomology, August 1928, Ithaca, NY. G. Patz, Naumburg, Germany.
- Trumble, J. T., E. E. Grafton-Cardwell, and M. J. Brewer. 1995.** Spatial dispersion and binomial sequential sampling for citricola scale (Homoptera: Coccidae) on citrus. J. Econ. Entomol. 88: 897–902.
- Tulashvili, N. 1930.** Observations on pests of tea and citrus on the Batum coast during 1927–28, pp. 189–230. In Mitt. PflSchAbt. Volhskom. Landw. SSR Georg. Tiflis, GA.
- Tuncyurek, M., and C. Oncuer. 1974.** Studies on aphelinid parasites and their hosts, citrus deaspine scale insects, in citrus orchards in the Aegean region. WPRS Bull. 3: 95–108.
- Tzalev, M. 1968.** Beitrag uber die erforschung der schildlausefauna (Homoptera, Coccoidea) der park und zierpflanzen in Bulgarien. Bulletin de Linstitut de Zoologie et Musee 28: 205–218.
- Üğentürk, S., and H. Çanakçioğlu. 2004.** Scale insect pests on ornamental plants in urban habitats in Turkey. J. Pest Sci. 77: 79–84.
- Üğentürk, S., H. Çanakçioğlu, and A. Toper Kaygin. 2004.** Scale insects of the conifer trees in Turkey and their zoogeographical distribution. J. Pest Sci. 77: 99–104.
- Vanek, S. J., and D. A. Potter. 2010.** Ant-exclusion to promote biological control of soft scales (Hemiptera: Coccidae) on woody landscape plants. Environ. Entomol. 39: 1829–1837.
- Vesey-Fitzgerald D. 1940.** The control of coccidae on coconut in the Seychelles. Bull. Entomol. Res. 31: 253–286.
- Viggiani, G. 1997.** Eulophidae, Pteromalidae, Eupelmidae and Signiphoridae, pp. 147–160. In Y. Ben-Dov and C. J. Hogson (eds.), Soft scale insects: their biology, natural enemies and control, vol. 7b. Elsevier Science B.V., Amsterdam, The Netherlands.
- Viggiani, G., P. Fimiani, and M. Bianco. 1973.** Ricerca di un metodo di lotta integrata per il controllo della *Saissetia oleae* (Oliv.). Atti Giornate Fitopatologiche, Bologna: 251–259.
- Vranjic, J. A. 1997.** Effects on Host Plant, p.p. 323–336. In Y. Ben-Dov and C. J. Hogson (eds.), Soft scale insects: their biology, natural enemies and control, vol. 7A. Elsevier Science B.V., Amsterdam, The Netherlands.
- Vu, N. T., R. Eastwood, C. T. Nguyen, and L. V. Pham. 2006.** The fig wax scale *Ceroplastes rusci* (Linnaeus)(Homoptera: Coccidae) in south-east Vietnam: pest status, life history and biocontrol trials with *Eublemma amabilis* Moore (Lepidoptera: Noctuidae). Entomol. Res. 36: 196–201.
- Wakgari, W. M., and J. H. Giliomee. 2000.** Fecundity, fertility and phenology of white wax scale, *Ceroplastes destructor* Newstead (Hemiptera: Coccidae), on citrus and *Syzygium* in South Africa. Afr. Entomol. 8: 233–242.
- Wakgari, W. M., and J. H. Giliomee. 2001.** Effects of some conventional insecticides and insect growth regulators on different phenological stages of the white wax scale, *Ceroplastes destructor* Newstead (Hemiptera: Coccidae), and its primary parasitoid, *Aprostocetus seroplastae* (Girault) (Hymenoptera: Eulophidae). Int. J. Pest Manag. 47: 179–184.
- Wallner, W. E. 1969.** Insects affecting woody ornamentals, shrubs and trees. Michigan State University Cooperative Extension Service, Farm Science

- Series, Extension Bulletin 530. East Lansing, MI. ([http://web2.msue.msu.edu/Bulletins/Bulletin/PDF/Historical/finished\\_pubs/e530/e530rev1.pdf](http://web2.msue.msu.edu/Bulletins/Bulletin/PDF/Historical/finished_pubs/e530/e530rev1.pdf)). Last accessed 14 February 2015.
- Wang, C., T. Mei, C. GuoHua, and S. YuJuan. 2006.** Studies on biological characteristics of *Ceroplastes pseudoceriferus* Green. Southwest China J. Agric. Sci. 19: 239–242.
- Washburn, J. O., and G. W. Frankie. 1981.** Dispersal of a scale insect, *Pulviniella mesembryanthemi* (Homoptera: Coccoidea) on iceplant in California. Environ. Entomol. 10: 724–727.
- Washburn, J. O., and L. Washburn. 1984.** Active aerial dispersal of minute wingless arthropods: Exploitation of boundary-layer velocity gradients. Science 223: 1088–1089.
- Washburn, J. O., G. W., Frankie, and J. K. Grace. 1985.** Effects of density on survival, development and fecundity of the soft scale, *Pulviniaria mesembryanthemi* (Homoptera: Coccidae) and its host plant. Environ. Entomol. 14: 755–761.
- Waterhouse, D. F., and D.P.A. Sands. 2001.** Classical biological control of arthropods in Australia. ACIAR Monograph 67, ACIAR (Australian Center for International Agricultural Research), Canberra, Australia.
- Waterworth, R. A., and J. G. Millar. 2012.** Reproductive biology of *Pseudococcus maritimus* (Hemiptera: Pseudococcidae). J. Econ. Entomol. 105: 949–956.
- Wen H. C. and H. S. Lee. 1986.** Seasonal abundance of the ceriferus wax scale *Ceroplastes pseudoceriferus* in southern Taiwan and its control. J. Agric. Res. Chin. 35: 216–221.
- Westcott, C. 1973.** The gardener's bug book, 4th ed. Doubleday, Garden City, NY.
- Williams, M. L. 1997.** The immature stages, pp. 31–48. In Y. Ben-Dov and C. J. Hodgson (eds.), Soft scale insects: their biology, natural enemies and control, vol. 7A. Elsevier Science B.V., Amsterdam, The Netherlands.
- Williams, M. L. and M. Kosztarab. 1972.** Morphology and systematics of the coccidae of Virginia with notes on their biology (Homoptera: Coccoidea). Res. Div. Bull. Virginia Polytechnic Inst. State Univ. 74: 1–215.
- Williams, J. R., and D. J. Williams 1980.** Excretory behavior in soft scales (Hemiptera: Coccidae). Bull. Entomol. Res. 70: 253–257.
- Wu, S., and W. Yu. 2000.** A study on *Physokermes shanxiensis* Tang (Homoptera: Coccoidea: Coccidae). Scient. Silvae Sin. 36: 98–102.
- Xia, C. Y., W. Zhang, X. Q. Sun, H. P. Li, and G. H. Dai. 2005.** Observations on biological habits of *Ceroplastes rubens* Maskell in Shanghai. J. Shanghai Jiaotong University (Agricultural Science) 4: 022.
- Xie, Y., X. Liu, J. Li, and M. Tang. 1995.** The effect of urban air pollution on populations of *Eulecanium giganteum* (Shinji) (Coccidae) in Taiyuan City, China. Israel J. Entomol. 29: 165–168.
- Yardeni, A. 1987.** Evaluation of wind dispersed soft scale crawlers (homoptera: Coccidae), in the infestation of a citrus grove in Israel. Israel J. Entomol. 21: 25–31.
- Yardeni, A., and D. Rosen. 1995.** Crawler phenology and generation development of the Florida wax scale, *Ceroplastes floridensis*, on citrus planted in two soil types. Phytoparasitica 23: 307–313.
- Yasumatsu, K. 1951.** Further investigations on the hymenopterous parasites of *Ceroplastes rubens* in Japan. J. Faculty Agric. Kyushu Univ. 10: 1–27.
- Yasumatsu K. 1953.** Preliminary investigations on the activity of a Kyushu race of *Anicetus ceroplustis* Ishii which has been liberated against *Ceroplastes rubens* Maskell in various districts of Japan. Sci. Bull. Faculty Agric. Kysuhu Univ. 14: 17–26.
- Yasumatsu, K. 1958.** An interesting case of biological control of *Ceroplastes rubens* Maskell in Japan, pp. 771–775. In Proceedings of the 10th International Congress of Entomology, 1956, Montreal, Canada.
- Yasumatsu, K. 1969.** Biological control of citrus pests in Japan. Proc. 1st Int. Citrus Symp. Riverside 2: 773–780.
- Yongxiang, W. 2008.** Occurrence regularity and damage of *Ceroplastes japonicus* in poplars [J]. Forest Pest and Dis. 4: 5.
- Yun, L. 1994.** A preliminary study on *Ceroplastes floridensis* Comstock. J. Yunnan Agric. Univ. 9: 137–140.
- Zhao, C., M. Feng, M. He, and X. Song. 1998.** Preliminary studies on biological characteristics of *Ericerus pela* Chavannes. J. Anhui Agric. College 25: 367.

Received 12 March 2015; accepted 30 September 2015.
